# Supplementary material
Source: publisher site journal article supplement (https://www.dovepress.com/article/331890)
Supplement: Supplementary file 1 [file get_supplementary_file.php]

**Supplementary Table 1** Positive culture samples of 208*Mycobacterium tuberculosis* strains

| Number | date of strain culture | Medical record number | sputum | gastric juice | BALF | cerebrospinal fluid | hydrothorax | seroperitoneum | Others | Interpretion |
| --- | --- | --- | --- | --- | --- | --- | --- | --- | --- | --- |
| 104 | 2018.2.23 | 1081960 |  | √ |  |  |  |  |  |  |
| 105 | 2018.2.23 | 1081333 |  | √ |  |  |  |  |  |  |
| 106 | 2018.2.16 | 1080629 |  |  |  |  | √ |  |  |  |
| 187 | 2018.3.2 | 1082418 |  |  |  | √ |  |  |  |  |
| 107 | 2018.3.30 | 1090929 | √ |  |  |  |  |  |  |  |
| 108 | 2018.4.27 | 1096239 |  |  |  |  | √ |  |  |  |
| 109 | 2018.4.27 | 1096709 |  | √ |  |  |  |  |  |  |
| 110 | 2018.4.27 | 1097990 |  | √ |  |  |  |  |  |  |
| 111 | 2018.5.18 | 1096781 |  |  |  |  |  | √ |  |  |
| 112 | 2018.5.18 | 1101260 | √ |  |  |  |  |  |  |  |
| 113 | 2018.5.18 | 1101356 |  | √ |  |  |  |  |  |  |
| 114 | 2018.5.18 | 1101525 | √ |  |  |  |  |  |  |  |
| 115 | 2018.5.25 | 1098043 |  |  |  | √ |  |  |  |  |
| 116 | 2018.5.25 | 1098026 |  |  |  | √ |  |  |  |  |
| 117 | 2018.7.20 | 1110420 |  |  |  | √ |  |  |  |  |
| 118 | 2018.8.24 | 1119827 |  |  |  | √ |  |  |  |  |
| 119 | 2018.8.24 | 1116695 |  | √ |  |  |  |  |  |  |
| 120 | 2018.8.24 | 1114348 | √ |  |  |  |  |  |  |  |
| 121 | 2018.11.2 | 1130386 |  | √ |  |  |  |  |  |  |
| 122 | 2018.11.23 | 1131588 |  |  |  | √ |  |  |  |  |
| 123 | 2018.11.23 | 1137553 |  | √ |  |  |  |  |  |  |
| 125 | 2018.12.7 | 1136036 | √ |  |  |  |  |  |  |  |
| 124 | 2018.11.9 | 1136210 |  | √ |  |  |  |  |  |  |
| 126 | 2018.12.21 | 1137829 |  | √ |  |  |  |  |  |  |
| 188 | 2018.12.21 | 1137787 | √ |  |  |  |  |  |  |  |
| 189 | 2018.12.28 | 1142362 | √ |  |  |  |  |  |  |  |
| 127 | 2019.1.11 | 1146264 | √ |  |  |  |  |  |  |  |
| 190 | 2019.1.25 | 1145235 |  |  |  | √ |  |  |  |  |
| 128 | 2019.1.11 | 1146437 |  | √ |  |  |  |  |  |  |
| 191 | 2019.1.25 | 1147417 |  |  |  |  |  | √ |  |  |
| 129 | 2019.2.1 | 1146666 | √ |  |  |  |  |  |  |  |
| 192 | 2019.2.1 | 1148823 | √ |  |  |  |  |  |  |  |
| 193 | 2019.2.22 | 1153008 | √ |  |  |  |  |  |  |  |
| 40 | 2019.2.22 | 1152792 |  | √ |  |  |  |  |  |  |
| 194 | 2019.2.22 | 1152533 | √ |  |  |  |  |  |  |  |
| 195 | 2019.3.8 | 1157493 | √ |  |  |  |  |  |  |  |
| 49 | 2019.8.30 | 1101762 |  | √ |  |  |  |  |  |  |
| 208 | 2019.11.14 | 1204985 |  | √ |  |  |  |  |  |  |
| 130 | 2019.11.28 | 1208748 | √ |  |  |  |  |  |  |  |
| 131 | 2019.12.16 | 1212297 |  | √ |  |  |  |  |  |  |
| 196 | 2020.1.9 | 1214385 |  |  |  | √ |  |  |  |  |
| 132 | 2020.1.9 | 1216118 |  |  |  | √ |  |  |  |  |
| 133 | 2020.1.9 | 1216825 | √ |  |  |  |  |  |  |  |
| 197 | 2020.2.20 | 1221634 | √ |  |  |  |  |  |  |  |
| 198 | 2020.2.20 | 1223192 |  | √ |  |  |  |  |  |  |
| 135 | 2020.2.20 | 1223576 |  | √ |  |  |  |  |  |  |
| 134 | 2020.2.20 | 1223794 | √ |  |  |  |  |  |  |  |
| 199 | 2020.2.20 | 1224469 |  | √ |  |  |  |  |  |  |
| 136 | 2020.2.20 | 1225135 |  | √ |  |  |  |  |  |  |
| 137 | 2020.3.19 | 1225294 |  | √ |  |  |  |  |  |  |
| 138 | 2020.3.19 | 1225122 | √ |  |  |  |  |  |  |  |
| 139 | 2020.3.19 | 1225853 | √ |  |  |  |  |  |  |  |
| 140 | 2020.3.19 | 1225732 |  | √ |  |  |  |  |  |  |
| 141 | 2020.3.19 | 1227783 |  | √ |  |  |  |  |  |  |
| 142 | 2020.3.29 | 1220490 | √ |  |  |  |  |  |  |  |
| 143 | 2020.3.29 | 1226921 | √ |  |  |  |  |  |  |  |
| 144 | 2020.4.2 | 1228227 |  |  |  | √ |  |  |  |  |
| 145 | 2020.4.2 | 1226925 | √ |  |  |  |  |  |  |  |
| 146 | 2020.4.2 | 1228170 | √ |  |  |  |  |  |  |  |
| 147 | 2020.4.9 | 1227402 |  |  |  | √ |  |  |  |  |
| 148 | 2020.4.9 | 1227211 |  | √ |  |  |  |  |  |  |
| 149 | 2020.4.9 | 1227641 | √ |  |  |  |  |  |  |  |
| 150 | 2020.4.9 | 1119103 | √ |  |  |  |  |  |  |  |
| 151 | 2020.4.9 | 1118275 | √ |  |  |  |  |  |  |  |
| 152 | 2020.5.29 | 1232643 |  | √ |  |  |  |  |  |  |
| 153 | 2020.5.29 | 1234720 |  |  | √ |  |  |  |  |  |
| 154 | 2020.5.29 | 1235887 | √ |  |  |  |  |  |  |  |
| 155 | 2020.5.29 | 1236059 |  | √ |  |  |  |  |  |  |
| 156 | 2020.5.29 | 1236382 |  |  | √ |  |  |  |  |  |
| 157 | 2020.5.29 | 1237982 |  |  |  |  | √ |  |  |  |
| 158 | 2020.7.10 | 1238959 |  |  |  | 2+ |  |  |  |  |
| 159 | 2020.7.10 | 1242203 |  | 3+ |  |  |  |  |  |  |
| 160 | 2020.7.17 | 1244160 | 4+ |  |  |  |  |  |  |  |
| 161 | 2020.7.17 | 1246148 | 2+ |  |  |  |  |  |  |  |
| 162 | 2020.7.17 | 1237120 | 2+ |  |  |  |  |  |  |  |
| 163 | 2020.08.19 | 1244309 |  | 2+ |  |  |  |  |  |  |
| 164 | 2020.08.19 | 1245421 |  |  |  |  | 2+ |  |  |  |
| 165 | 2020.08.19 | 1245833 | 2+ |  |  |  |  |  |  |  |
| 166 | 2020.08.19 | 1246207 | 2+ |  |  |  |  |  |  |  |
| 167 | 2020.08.19 | 1247539 | 3+ |  |  |  |  |  |  |  |
| 168 | 2020.08.19 | 1248873 |  |  | 3+ |  |  |  |  |  |
| 169 | 2020.08.22 | 1250167 |  |  | 3+ |  |  |  |  |  |
| 170 | 2020.08.22 | 1251544 | 3+ |  |  |  |  |  |  |  |
| 200 | 2020.08.22 | 1251304 |  | 3+ |  |  |  |  |  |  |
| 201 | 2020.09.05 | 1248358 | 3+ |  |  |  |  |  |  |  |
| 171 | 2020.09.05 | 1251156/1258067 | 2+ |  |  |  |  |  |  |  |
| 202 | 2020.09.05 | 1251041 | 2+ |  |  |  |  |  |  |  |
| 172 | 2020.09.05 | 1253502 |  |  | 2+ |  |  |  |  |  |
| 203 | 2020.09.21 | 1247953 | 3+ |  |  |  |  |  |  |  |
| 204 | 2020.09.21 | 1251877 |  |  |  |  |  |  | puncture fluid1+ | subthoracic cold abscess pus |
| 205 | 2020.09.21 | 1252679 |  |  |  |  |  |  | puncture fluid2+ | subthoracic cold abscess pus |
| 206 | 2020.09.21 | 1256286 | 2+ |  |  |  |  |  |  |  |
| 173 | 2020.09.21 | 1251181 | 3+ |  |  |  |  |  |  |  |
| 174 | 2020.10.25 | 1254924 |  |  | 3+ |  |  |  |  |  |
| 175 | 2020.10.25 | 1258969 | 3+ |  |  |  |  |  |  |  |
| 177 | 2020.11.13 | 1259378 | 3+ |  |  |  |  |  |  |  |
| 178 | 2020.11.13 | 1257839 | 2+ |  |  |  |  |  |  |  |
| 176 | 2020.11.13 | 1260032 |  | 1+ |  |  |  |  |  |  |
| 179 | 2020.11.13 | 1259735 |  |  |  | 2+ |  |  |  |  |
| 207 | 2020.11.13 | 1260846 |  |  | 1+ |  |  |  |  |  |
| 180 | 2020.11.13 | 1247295 | 2+ |  |  |  |  |  |  |  |
| 181 | 2020.11.13 | 1264735 | 3+ |  |  |  |  |  |  |  |
| 182 | 2020.11.20 | 1261044 |  | 1+ |  |  |  |  |  |  |
| 183 | 2020.11.20 | 1265295 |  |  |  |  | 1+ |  |  |  |
| 184 | 2020.11.20 | 1264809 |  | 1+ |  |  |  |  |  |  |
| 185 | 2020.12.4 | 1267823 |  |  | 2+ |  |  |  |  |  |
| 186 | 2020.12.25 | 1271306 |  | 1+ |  |  |  |  |  |  |
| 1 | 2019.3.1 | 1154586 |  | √ |  |  |  |  |  |  |
| 2 | 2019.3.1 | 1155239 |  | √ |  |  |  |  |  |  |
| 3 | 2019.3.1 | 1156852 | √ |  |  |  |  |  |  |  |
| 4 | 2019.4.26 | 1162277 | √ |  |  |  |  |  |  |  |
| 5 | 2019.4.26 | 1166034 |  | √ |  |  |  |  |  |  |
| 6 | 2019.4.26 | 1165413 |  | √ |  |  |  |  |  |  |
| 7 | 2019.8.2 | 1186830 | √ |  |  |  |  |  |  |  |
| 8 | 2019.8.2 | 1185988 |  |  | √ |  |  |  |  |  |
| 9 | 2019.9.6 | 1190903 |  | √ |  |  |  |  |  |  |
| 10 | 2019.9.6 | 1191105 |  |  |  |  | √ |  |  |  |
| 11 | 2019.5.10 | 1167399 |  | √ |  |  |  |  |  |  |
| 12 | 2016.3.11 | 959399 |  |  |  |  | √ |  |  |  |
| 13 | 2019.7.5 | 1180590 | √ |  |  |  |  |  |  |  |
| 14 | 2019.8.2 | 1182075 |  | √ |  |  |  |  |  |  |
| 15 | 2017.1.13 | 1014759 | √ |  |  |  |  |  |  |  |
| 16 | 2019.10.17 | 1200645 | √ |  |  |  |  |  |  |  |
| 17 | 2016.3.18 | 960962 |  | √ |  |  |  |  |  |  |
| 18 | 2016.4.1 | 963885 | √ |  |  |  |  |  |  |  |
| 19 | 2019.10.17 | 1198865 | √ |  |  |  |  |  |  |  |
| 20 | 2019.10.17 | 1198907 |  | √ |  |  |  |  |  |  |
| 21 | 2019.8.30 | 1192683 | √ |  |  |  |  |  |  |  |
| 22 | 2019.9.3 | 1193134 |  | √ |  |  |  |  |  |  |
| 23 | 2019.10.9 | 1199356 |  | √ |  |  |  |  |  |  |
| 24 | 2019.11.28 | 1193522 |  |  |  |  |  |  | joint fluid√ |  |
| 25 | 2016.5.20 | 972913 |  | √ |  |  |  |  |  |  |
| 26 | 2016.3.11 | 959937 |  |  |  | √ |  |  |  |  |
| 27 | 2019.10.9 | 1194819 |  | √ |  |  |  |  |  |  |
| 28 | 2015.12.4 | 945091 | √ |  |  |  |  |  |  |  |
| 29 | 2015.12.4 | 947038 | √ |  |  |  |  |  |  |  |
| 30 | 2015.12.4 | 946580 |  | √ |  |  |  |  |  |  |
| 31 | 2016.1.8 | 948782 | √ |  |  |  |  |  |  |  |
| 32 | 2016.1.9 | 949106 |  |  |  |  | √ |  |  |  |
| 33 | 2016.1.15 | 950687 |  | √ |  |  |  |  |  |  |
| 34 | 2016.1.15 | 953327 | √ |  |  |  |  |  |  |  |
| 35 | 2016.1.29 | 951763 |  |  |  |  |  |  | pus | subthoracic cold abscess pus |
| 36 | 2016.3.18 | 961238 |  |  |  |  | √ |  |  |  |
| 37 | 2016.1.22 | 953051 |  |  |  |  |  |  | puncture fluid | subthoracic cold abscess pus |
| 38 | 2016.1.15 | 953249 |  |  |  | √ |  |  |  |  |
| 41 | 2015.8.12 | 928758 |  | √ |  |  |  |  |  |  |
| 43 | 2015.9.8 | 930534 |  |  |  | √ |  |  |  |  |
| 44 | 2016.2.19 | 957538 |  | √ |  |  |  |  |  |  |
| 45 | 2016.5.7 | 970614 |  | √ |  |  |  |  |  |  |
| 46 | 2015.10.3 | 939283 |  | √ |  |  |  |  |  |  |
| 47 | 2015.11.20 | 944330 |  | √ |  |  |  |  |  |  |
| 48 | 2019.4.5 | 1159997 | √ |  |  |  |  |  |  |  |
| 50 | 2019.11.28 | 1202785 |  |  | √ |  |  |  |  |  |
| 51 | 2019.11.28 | 1204664 |  |  |  | √ |  |  |  |  |
| 52 | 2019.12.5 | 1207558 |  | √ |  |  |  |  |  |  |
| 53 | 2019.12.5 | 1207932 | √ |  |  |  |  |  |  |  |
| 54 | 2019.12.5 | 1208560 |  | √ |  |  |  |  |  |  |
| 55 | 2019.12.5 | 1208670 |  |  | √ |  |  |  |  |  |
| 56 | 2017.3.3 | 1021784 |  |  |  | √ |  |  |  |  |
| 57 | 2017.3.3 | 1022909 | √ |  |  |  |  |  |  |  |
| 58 | 2017.3.10 | 999524 |  |  | √ |  |  |  |  |  |
| 60 | 2017.3.31 | 1027268 |  | √ |  |  |  |  |  |  |
| 61 | 2017.4.7 | 1025530 |  |  |  |  | √ |  |  |  |
| 62 | 2017.9.8 | 1050796 |  | √ |  |  |  |  |  |  |
| 63 | 2017.12.1 | 1039080 |  |  |  |  |  |  | pusP | subthoracic cold abscess pus |
| 64 | 2017.12.22 | 1070752 |  | √ |  |  |  |  |  |  |
| 39 | 2017.12.22 | 1069945 |  |  | √ |  |  |  |  |  |
| 65 | 2017.12.15 | 1069816 |  | √ |  |  |  |  |  |  |
| 66 | 2018.2.16 | 1082741 | √ |  |  |  |  |  |  |  |
| 67 | 2018.4.27 | 1092275 | √ |  |  |  |  |  |  |  |
| 42 | 2016.4.22 | 969856 | √ |  |  |  |  |  |  |  |
| 68 | 2016.2.19 | 955775 | √ |  |  |  |  |  |  |  |
| 69 | 2016.3.18 | 965149 |  | √ |  |  |  |  |  |  |
| 70 | 2016.4.15 | 964285 |  |  |  | √ |  |  |  |  |
| 71 | 2016.4.8 | 967112 | √ |  |  |  |  |  |  |  |
| 73 | 2016.5.6 | 969726 |  |  |  |  | √ |  |  |  |
| 75 | 2016.12.2 | 1009182 |  |  |  |  | √ |  |  |  |
| 76 | 2016.11.25 | 1002617 | √ |  |  |  |  |  |  |  |
| 77 | 2017.1.20 | 1014877 |  |  |  | √ |  |  |  |  |
| 97 | 2017.6.2 | 1034898 | √ |  |  |  |  |  |  |  |
| 80 | 2015.11.27 | 941893 |  | √ |  |  |  |  |  |  |
| 82 | 2016.4.8 | 963080 | √ |  |  |  |  |  |  |  |
| 72 | 2016.4.8 | 967166 | √ |  |  |  |  |  |  |  |
| 74 | 2016.12.2 | 1008571 |  | √ |  |  |  |  |  |  |
| 83 | 2017.2.24 | 1020826 | √ |  |  |  |  |  |  |  |
| 84 | 2017.2.24 | 1020930 |  | √ |  |  |  |  |  |  |
| 85 | 2017.2.24 | 1021040 |  |  | √ |  |  |  |  |  |
| 86 | 2017.3.10 | 1024336 | √ |  |  |  |  |  |  |  |
| 87 | 2017.3.24 | 1025061 | √ |  |  |  |  |  |  |  |
| 88 | 2017.3.24 | 1027058 | √ |  |  |  |  |  |  |  |
| 89 | 2017.3.24 | 1027519 |  | √ |  |  |  |  |  |  |
| 90 | 2017.3.24 | 1027931 |  | √ |  |  |  |  |  |  |
| 91 | 2017.3.31 | 1028460 | √ |  |  |  |  |  |  |  |
| 92 | 2017.3.31 | 1028953 | √ |  |  |  |  |  |  |  |
| 59 | 2017.4.7 | 1027129 |  | √ |  |  |  |  |  |  |
| 93 | 2017.4.7 | 1027635 |  | √ |  |  |  |  |  |  |
| 94 | 2017.4.7 | 1028205 |  |  |  |  | √ |  |  |  |
| 95 | 2017.4.21 | 1029190 |  | √ |  |  |  |  |  |  |
| 96 | 2017.4.21 | 1033264 | √ |  |  |  |  |  |  |  |
| 98 | 2017.8.4 | 1049731 | √ |  |  |  |  |  |  |  |
| 99 | 2017.9.15 | 1054105 |  | √ |  |  |  |  |  |  |
| 100 | 2017.9.22 | 1053153 |  | √ |  |  |  |  |  |  |
| 101 | 2017.12.22 | 1070025 |  |  | √ |  |  |  |  |  |
| 102 | 2017.12.29 | 1072906 |  |  |  |  | √ |  |  |  |
| 103 | 2018.1.26 | 1075899 |  |  |  | √ |  |  |  |  |
| 78 | 2015.8.21 | 931948 |  |  |  | √ |  |  |  |  |
| 79 | 2015.10.4 | 936691 |  | √ |  |  |  |  |  |  |
| 81 | 2016.4.22 | 964453 | √ |  |  |  |  |  |  |  |

**Supplementary Table 2** Results of the ratio method drug susceptibility test of 208 Mycobacterium tuberculosis strains by proportional method

| Number | Strain number | INH | RIF | EMB | RFT | AMK | PTH | Lvfx | MFX |
| --- | --- | --- | --- | --- | --- | --- | --- | --- | --- |
| 104 | 102 | S | S | S | S | S | S | S | S |
| 105 | 103 | S | S | S | S | S | S | S | S |
| 106 | 105 | S | S | S | S | S | S | S | S |
| 187 | 108 | R | R | R | R | S | S | S | S |
| 107 | 113 | S | S | S | S | S | S | S | S |
| 108 | 117 | S | S | S | S | S | S | S | S |
| 109 | 118 | S | S | S | S | S | S | S | S |
| 110 | 120 | S | S | S | S | S | S | S | S |
| 111 | 124 | S | S | S | S | S | S | S | S |
| 112 | 125 | S | S | S | S | S | S | S | S |
| 113 | 126 | S | S | S | S | S | S | S | S |
| 114 | 128 | S | S | S | S | S | S | S | S |
| 115 | 130 | S | S | S | S | S | S | S | S |
| 116 | 131 | S | S | S | S | S | S | S | S |
| 117 | 147 | S | S | S | S | S | S | S | S |
| 118 | 149 | R | R | S | R | S | S | S | S |
| 119 | 150 | S | S | S | S | S | S | R | R |
| 120 | 151 | S | S | S | S | S | S | S | S |
| 121 | 167 | S | S | S | S | S | S | S | S |
| 122 | 171 | S | S | S | S | S | S | S | S |
| 123 | 172 | S | S | S | S | S | S | S | S |
| 125 | 174 | S | S | S | S | S | S | R | R |
| 124 | 176 | S | S | S | S | S | S | S | S |
| 126 | 179 | S | S | S | S | S | S | S | S |
| 188 | 180 | R | S | S | S | S | S | S | S |
| 189 | 181 | S | S | S | S | S | S | S | S |
| 127 | 183 | S | S | S | S | S | S | S | S |
| 190 | 184 | R | S | S | S | S | S | S | S |
| 128 | 187 | S | S | S | S | S | S | S | S |
| 191 | 189 | S | S | S | S | S | S | S | S |
| 129 | 190 | S | S | S | S | S | S | S | S |
| 192 | 192 | S | S | S | S | S | S | S | S |
| 193 | 197 | S | S | S | S | S | S | S | S |
| 40 | 198 | R | R | R | R | S | R | S | S |
| 194 | 199 | S | S | S | S | S | S | S | S |
| 195 | 204 | S | S | S | S | S | S | S | S |
| 49 | 244 | S | S | S | S | S | S | S | S |
| 208 | 262 | S | S | S | S | S | S | S | S |
| 130 | 273 | S | S | S | S | S | S | S | S |
| 131 | 279 | S | S | S | S | S | S | S | S |
| 196 | 280 | S | S | S | S | S | S | S | S |
| 132 | 283 | S | S | S | S | S | S | S | S |
| 133 | 285 | S | S | S | S | S | S | S | S |
| 197 | 288 | S | S | S | S | S | S | S | S |
| 198 | 292 | S | S | S | S | S | S | S | S |
| 135 | 293 | S | S | S | S | S | S | S | R |
| 134 | 295 | S | S | S | S | S | S | S | S |
| 199 | 296 | S | S | S | S | S | S | S | S |
| 136 | 298 | S | S | S | S | S | S | S | S |
| 137 | 300 | S | S | S | S | S | S | S | S |
| 138 | 302 | S | S | S | S | S | S | S | S |
| 139 | 304 | S | S | S | S | S | S | S | S |
| 140 | 306 | S | S | S | S | S | S | S | S |
| 141 | 308 | S | S | S | S | S | S | S | S |
| 142 | 309 | S | S | S | S | S | S | S | S |
| 143 | 310 | S | S | S | S | S | S | S | S |
| 144 | 313 | S | S | S | S | S | S | S | S |
| 145 | 314 | S | S | S | S | S | S | S | S |
| 146 | 315 | S | S | S | S | S | S | S | S |
| 147 | 318 | S | S | S | S | S | S | S | S |
| 148 | 319 | R | S | S | S | S | S | S | S |
| 149 | 320 | S | S | S | S | S | S | S | S |
| 150 | 323 | S | S | S | S | S | S | S | S |
| 151 | 325 | S | S | S | S | S | S | S | S |
| 152 | 337 | S | S | S | S | S | S | S | S |
| 153 | 343 | S | S | S | S | S | S | S | S |
| 154 | 344 | R | R | R | R | S | S | S | S |
| 155 | 345 | R | R | R | R | S | S | S | S |
| 156 | 346 | S | S | S | S | S | S | S | S |
| 157 | 347 | S | S | S | S | S | S | S | S |
| 158 | 364 | R | R | R | R | S | S | S | S |
| 159 | 368 | S | S | S | S | S | S | S | S |
| 160 | 369 | S | S | S | S | S | S | S | S |
| 161 | 371 | S | S | S | S | S | S | S | S |
| 162 | 372 | R | S | S | S | S | R | S | S |
| 163 | 373 | S | S | S | S | S | S | S | S |
| 164 | 374 | S | S | S | S | S | S | S | S |
| 165 | 376 | R | R | R | R | S | S | S | S |
| 166 | 377 | S | S | S | S | S | S | S | S |
| 167 | 379 | S | S | S | S | S | S | S | S |
| 168 | 381 | S | S | R | S | S | S | S | S |
| 169 | 382 | S | S | S | S | S | S | S | S |
| 170 | 383 | S | S | S | S | S | S | S | S |
| 200 | 385 | R | R | R | R | S | S | S | S |
| 201 | 386 | S | S | S | S | S | S | S | S |
| 171 | 387 | S | S | S | S | S | S | S | S |
| 202 | 389 | S | S | S | S | S | S | S | S |
| 172 | 391 | S | S | S | S | S | S | S | S |
| 203 | 392 | S | S | S | S | S | S | S | S |
| 204 | 393 | R | S | S | S | S | S | S | S |
| 205 | 394 | S | S | S | S | S | S | S | S |
| 206 | 396 | S | S | R | S | S | S | R | R |
| 173 | 397 | S | S | S | S | S | S | S | S |
| 174 | 399 | R | S | S | S | S | S | S | S |
| 175 | 400 | R | S | S | S | S | S | S | S |
| 177 | 404 | S | S | R | S | S | S | S | S |
| 178 | 405 | S | S | S | S | S | S | S | S |
| 176 | 407 | S | S | S | S | S | S | S | S |
| 179 | 408 | S | S | S | S | S | S | S | S |
| 207 | 411 | S | S | S | S | S | S | S | S |
| 180 | 412 | S | S | S | S | S | S | S | S |
| 181 | 414 | S | S | S | S | S | S | S | S |
| 182 | 416 | S | S | S | S | S | S | S | S |
| 183 | 420 | S | S | S | S | S | S | S | S |
| 184 | 421 | S | S | S | S | S | S | S | S |
| 185 | 423 | S | S | S | S | S | S | S | S |
| 186 | 428 | S | S | S | S | S | S | S | S |
| 1 | C01 | S | S | S | S | S | S | S | S |
| 2 | C02 | S | S | S | S | S | S | S | S |
| 3 | C03 | R | S | S | S | S | S | S | S |
| 4 | C04 | S | S | S | S | S | S | S | S |
| 5 | C05 | S | S | S | S | S | S | S | S |
| 6 | C06 | S | S | S | S | S | S | S | S |
| 7 | C07 | S | S | S | S | S | S | S | S |
| 8 | C08 | S | S | S | S | S | S | S | S |
| 9 | C09 | S | S | S | S | S | S | S | S |
| 10 | C10 | R | S | S | S | S | S | S | S |
| 11 | C11 | S | S | S | S | S | S | S | S |
| 12 | C12 | S | S | S | S | S | S | S | S |
| 13 | C13 | S | S | S | S | S | S | S | S |
| 14 | C16 | S | S | S | S | S | S | S | S |
| 15 | C17 | S | S | S | S | S | S | S | S |
| 16 | C18 | S | S | S | S | S | S | S | S |
| 17 | C19 | S | S | S | S | S | S | S | S |
| 18 | C20 | S | S | S | S | S | S | S | S |
| 19 | C21 | S | S | S | S | S | S | S | S |
| 20 | C22 | S | S | S | S | S | S | S | S |
| 21 | C23 | R | R | R | R | S | S | R | R |
| 22 | C24 | S | S | S | S | S | S | S | S |
| 23 | C25 | S | S | S | S | S | S | S | S |
| 24 | C26 | S | S | S | S | S | S | S | S |
| 25 | C27 | S | S | R | S | S | S | S | S |
| 26 | C28 | S | S | S | S | S | S | S | S |
| 27 | C29 | S | S | S | S | S | S | S | S |
| 28 | C31 | S | S | S | S | S | S | S | S |
| 29 | C32 | S | S | S | S | S | S | S | S |
| 30 | C33 | S | S | S | S | S | S | S | S |
| 31 | C34 | S | S | S | S | S | S | S | S |
| 32 | C35 | S | S | S | S | S | S | S | S |
| 33 | C36 | S | S | S | S | S | S | S | S |
| 34 | C37 | S | S | S | S | S | S | S | S |
| 35 | C38 | S | S | S | S | S | S | S | S |
| 36 | C39 | S | S | S | S | S | S | S | S |
| 37 | C42 | S | S | S | S | S | S | S | S |
| 38 | C43 | S | S | S | S | S | S | S | S |
| 41 | C44 | S | S | S | S | S | S | S | S |
| 43 | C46 | S | S | S | S | S | S | S | S |
| 44 | C47 | S | S | S | S | S | S | S | S |
| 45 | C48 | S | S | R | S | S | S | S | S |
| 46 | C49 | S | S | S | S | S | S | S | S |
| 47 | C50 | S | S | S | S | S | S | S | S |
| 48 | C52 | S | S | S | R | S | S | S | S |
| 50 | C58 | S | S | S | S | S | S | S | S |
| 51 | C59 | S | S | S | S | S | S | S | S |
| 52 | C61 | S | S | S | S | S | S | S | S |
| 53 | C62 | R | R | S | R | S | S | S | S |
| 54 | C63 | S | S | S | S | S | S | S | S |
| 55 | C64 | S | S | S | S | S | S | S | S |
| 56 | C66 | S | S | S | S | S | S | S | S |
| 57 | C67 | S | S | S | S | S | S | S | S |
| 58 | C68 | S | S | S | S | S | S | S | S |
| 60 | C70 | S | S | S | S | S | S | S | S |
| 61 | C71 | S | S | S | S | S | S | S | S |
| 62 | C72 | S | S | S | S | S | S | S | S |
| 63 | C73 | R | R | S | R | R | S | S | S |
| 64 | C74 | S | S | S | S | S | S | S | S |
| 39 | C75 | R | R | S | R | R | R | R | R |
| 65 | C76 | S | S | S | S | S | S | S | S |
| 66 | C77 | S | S | S | S | S | S | S | S |
| 67 | C78 | S | S | S | R | S | S | S | S |
| 42 | C79 | R | R | R | R | S | S | S | S |
| 68 | C82 | S | S | S | S | S | S | S | S |
| 69 | C83 | S | S | S | S | S | S | S | S |
| 70 | C85 | S | S | S | S | S | S | S | S |
| 71 | C86 | S | S | S | S | S | S | S | S |
| 73 | C88 | R | S | S | R | S | S | S | S |
| 75 | C91 | S | S | S | S | S | S | S | S |
| 76 | C92 | S | S | S | S | S | S | S | S |
| 77 | C93 | S | S | S | S | S | S | S | S |
| 97 | X101 | S | S | S | S | S | S | S | S |
| 80 | X2 | S | S | S | S | S | S | S | S |
| 82 | X21 | S | S | S | S | S | S | S | S |
| 72 | X25 | S | S | S | S | S | S | S | S |
| 74 | X29 | S | S | S | S | S | S | S | S |
| 83 | X52 | S | S | S | S | S | S | S | S |
| 84 | X53 | S | S | S | S | S | S | S | S |
| 85 | X54 | S | S | S | S | S | S | S | S |
| 86 | X58 | S | S | S | S | S | S | S | S |
| 87 | X59 | S | S | S | S | S | S | S | S |
| 88 | X64 | S | S | S | S | S | S | S | S |
| 89 | X65 | S | S | S | S | S | S | S | S |
| 90 | X66 | S | S | S | S | S | S | S | S |
| 91 | X69 | S | S | S | S | S | S | S | S |
| 92 | X70 | S | S | S | S | S | S | S | S |
| 59 | X72 | R | S | S | S | S | R | S | S |
| 93 | X73 | S | S | S | S | S | S | S | S |
| 94 | X74 | S | S | S | S | S | S | S | S |
| 95 | X75 | R | S | S | S | S | S | S | S |
| 96 | X76 | S | S | S | S | S | S | R | R |
| 98 | X78 | S | S | S | S | S | S | S | S |
| 99 | X80 | S | S | S | S | S | S | S | S |
| 100 | X81 | S | S | S | S | S | S | S | S |
| 101 | X84 | S | S | S | S | S | S | S | S |
| 102 | X87 | S | S | S | S | S | S | S | S |
| 103 | X88 | S | S | S | S | S | S | S | S |
| 78 | X91 | S | S | S | S | S | S | R | R |
| 79 | X97 | S | S | S | S | S | S | S | S |
| 81 | X99 | S | S | S | S | S | S | S | S |

**Supplementary Table 3** The whole-genome sequencing mapping result of 208 Mycobacterium tuberculosis

| ID | startpos | endpos | numreads | covbases | coverage | meandepth | meanbaseq | meanmapq |
| --- | --- | --- | --- | --- | --- | --- | --- | --- |
| 102_FDSW210068428-1r | 1 | 4411532 | 6931006 | 4374078 | 99.151 | 235.451 | 36.5 | 59.1 |
| 103_FDSW210068429-1r | 1 | 4411532 | 8575156 | 4377821 | 99.2358 | 291.291 | 36.4 | 59 |
| 105_FDSW210097805-1r | 1 | 4411532 | 5668488 | 4379670 | 99.2778 | 192.552 | 36 | 59.1 |
| 108_FDSW210146955-1r | 1 | 4411532 | 8021005 | 4381636 | 99.3223 | 261.733 | 36.5 | 59 |
| 113_FDSW210097807-1r | 1 | 4411532 | 5466800 | 4391403 | 99.5437 | 185.752 | 35.9 | 59.4 |
| 117_FDSW210068435-1r | 1 | 4411532 | 7324299 | 4401730 | 99.7778 | 248.832 | 36.5 | 59.2 |
| 118_FDSW210068436-1r | 1 | 4411532 | 6787619 | 4379870 | 99.2823 | 230.601 | 36.5 | 59.1 |
| 120_FDSW210068438-1r | 1 | 4411532 | 7534900 | 4404638 | 99.8437 | 255.999 | 36.4 | 59.3 |
| 124_FDSW210097808-1r | 1 | 4411532 | 5653758 | 4374695 | 99.165 | 192.041 | 36 | 59 |
| 125_FDSW210097809-1r | 1 | 4411532 | 5908342 | 4381601 | 99.3215 | 200.733 | 36 | 59.1 |
| 126_FDSW210097810-1r | 1 | 4411532 | 10522597 | 4378032 | 99.2406 | 357.475 | 36 | 59 |
| 128_FDSW210097811-1r | 1 | 4411532 | 10369163 | 4378345 | 99.2477 | 352.316 | 36 | 59 |
| 130_FDSW210068442-1r | 1 | 4411532 | 8033076 | 4391925 | 99.5556 | 272.963 | 36.5 | 59.2 |
| 131_FDSW210097812-1r | 1 | 4411532 | 9393574 | 4379363 | 99.2708 | 319.125 | 36 | 59.1 |
| 147_FDSW210068445-1r | 1 | 4411532 | 8256188 | 4389688 | 99.5048 | 280.482 | 36.5 | 59.2 |
| 149_FDSW210097815-1r | 1 | 4411532 | 11951980 | 4377331 | 99.2247 | 406.055 | 35.8 | 59.2 |
| 150_FDSW210097816-1r | 1 | 4411532 | 5310181 | 4369105 | 99.0383 | 180.402 | 35.9 | 59.1 |
| 151_FDSW210097817-1r | 1 | 4411532 | 5743229 | 4376462 | 99.205 | 195.109 | 35.9 | 59.2 |
| 167_FDSW210097819-1r | 1 | 4411532 | 1478240 | 4374459 | 99.1596 | 50.2052 | 36.1 | 59 |
| 171_FDSW210068451-1r | 1 | 4411532 | 8563015 | 4396478 | 99.6588 | 290.859 | 36.5 | 59.2 |
| 172_FDSW210068452-1r | 1 | 4411532 | 7811258 | 4398193 | 99.6976 | 265.369 | 36.4 | 59.2 |
| 174_FDSW210097820-1r | 1 | 4411532 | 11070490 | 4383287 | 99.3597 | 376.068 | 36.1 | 59 |
| 176_FDSW210097822-1r | 1 | 4411532 | 5306690 | 4371198 | 99.0857 | 180.291 | 35.8 | 59.1 |
| 179_FDSW210097824-1r | 1 | 4411532 | 10080987 | 4403982 | 99.8289 | 342.536 | 35.8 | 59.4 |
| 180_FDSW210146956-1r | 1 | 4411532 | 8812135 | 4384907 | 99.3965 | 287.369 | 36.4 | 59 |
| 181_FDSW210146957-1r | 1 | 4411532 | 8414965 | 4377834 | 99.2361 | 274.361 | 36.4 | 58.9 |
| 183_FDSW210097825-1r | 1 | 4411532 | 12076765 | 4383044 | 99.3542 | 410.28 | 36 | 59.1 |
| 184_FDSW210146958-1r | 1 | 4411532 | 9187367 | 4391632 | 99.5489 | 299.873 | 36.5 | 59.3 |
| 187_FDSW210068463-1r | 1 | 4411532 | 7529590 | 4381198 | 99.3124 | 255.684 | 36.4 | 59 |
| 189_FDSW210146959-1r | 1 | 4411532 | 8906998 | 4379737 | 99.2793 | 290.419 | 36.4 | 59 |
| 190_FDSW210097827-1r | 1 | 4411532 | 10658699 | 4379513 | 99.2742 | 362.099 | 36 | 59.2 |
| 192_FDSW210146960-1r | 1 | 4411532 | 8015004 | 4382531 | 99.3426 | 261.386 | 36.4 | 58.9 |
| 197_FDSW210146961-1r | 1 | 4411532 | 8758100 | 4373922 | 99.1475 | 285.818 | 36.5 | 58.9 |
| 198_FDSW210068471-1r | 1 | 4411532 | 8152122 | 4382072 | 99.3322 | 276.806 | 36.4 | 58.9 |
| 199_FDSW210146962-1r | 1 | 4411532 | 7435436 | 4377216 | 99.2221 | 242.583 | 36.5 | 58.9 |
| 204_FDSW210146963-1r | 1 | 4411532 | 7983003 | 4370814 | 99.077 | 260.294 | 36.4 | 59.1 |
| 244_FDSW210068477-1r | 1 | 4411532 | 7843673 | 4379711 | 99.2787 | 266.412 | 36.4 | 59.1 |
| 262_FDSW210146964-1r | 1 | 4411532 | 7939029 | 4382415 | 99.34 | 258.79 | 36.4 | 59.1 |
| 273_FDSW210097837-1r | 1 | 4411532 | 9986833 | 4375087 | 99.1739 | 339.228 | 36 | 59.2 |
| 279_FDSW210097838-1r | 1 | 4411532 | 10996031 | 4381855 | 99.3273 | 373.49 | 36 | 59 |
| 280_FDSW210146968-1r | 1 | 4411532 | 8786174 | 4374225 | 99.1543 | 286.49 | 36.4 | 59.1 |
| 283_FDSW210097839-1r | 1 | 4411532 | 9898017 | 4399431 | 99.7257 | 336.335 | 36 | 59.3 |
| 285_FDSW210068488-1r | 1 | 4411532 | 7037185 | 4380936 | 99.3065 | 239.028 | 36.5 | 59 |
| 288_FDSW210146970-1r | 1 | 4411532 | 9531066 | 4380059 | 99.2866 | 310.757 | 36.4 | 58.9 |
| 292_FDSW210146974-1r | 1 | 4411532 | 9095748 | 4375788 | 99.1898 | 296.429 | 36.3 | 59 |
| 293_FDSW210097840-1r | 1 | 4411532 | 5304034 | 4382310 | 99.3376 | 180.193 | 35.7 | 59.1 |
| 295_FDSW210097841-1r | 1 | 4411532 | 10783261 | 4380435 | 99.2951 | 366.264 | 35.9 | 59.1 |
| 296_FDSW210146976-1r | 1 | 4411532 | 7761612 | 4398668 | 99.7084 | 253.301 | 36.5 | 59.2 |
| 298_FDSW210097842-1r | 1 | 4411532 | 5785170 | 4377135 | 99.2203 | 196.541 | 35.9 | 59 |
| 300_FDSW210068501-1r | 1 | 4411532 | 7811685 | 4402911 | 99.8046 | 265.366 | 36.4 | 59.1 |
| 302_FDSW210068503-1r | 1 | 4411532 | 7634793 | 4379818 | 99.2811 | 259.329 | 36.5 | 59 |
| 304_FDSW210097845-1r | 1 | 4411532 | 10878005 | 4378959 | 99.2616 | 369.618 | 36 | 59 |
| 306_FDSW210068507-1r | 1 | 4411532 | 7868675 | 4405786 | 99.8698 | 267.356 | 36.5 | 59.2 |
| 308_FDSW210068509-1r | 1 | 4411532 | 7257689 | 4379670 | 99.2778 | 246.534 | 36.4 | 59 |
| 309_FDSW210097847-1r | 1 | 4411532 | 5519930 | 4396443 | 99.658 | 187.532 | 35.9 | 59.2 |
| 310_FDSW210068511-1r | 1 | 4411532 | 7381973 | 4393119 | 99.5826 | 250.812 | 36.4 | 59.3 |
| 313_FDSW210068514-1r | 1 | 4411532 | 7858835 | 4373929 | 99.1476 | 266.98 | 36.5 | 59.2 |
| 314_FDSW210068515-1r | 1 | 4411532 | 8000735 | 4388988 | 99.489 | 271.848 | 36.5 | 59.2 |
| 315_FDSW210068516-1r | 1 | 4411532 | 7124080 | 4392790 | 99.5752 | 242.065 | 36.4 | 59.2 |
| 318_FDSW210068519-1r | 1 | 4411532 | 7712813 | 4366967 | 98.9898 | 261.962 | 36.5 | 59 |
| 319_FDSW210068520-1r | 1 | 4411532 | 8162702 | 4379843 | 99.2817 | 277.227 | 36.5 | 59.1 |
| 320_FDSW210097848-1r | 1 | 4411532 | 5538697 | 4379210 | 99.2673 | 187.998 | 36 | 59.3 |
| 323_FDSW210068524-1r | 1 | 4411532 | 6795194 | 4379372 | 99.271 | 230.845 | 36.5 | 59 |
| 325_FDSW210097849-1r | 1 | 4411532 | 5584684 | 4386386 | 99.43 | 189.755 | 35.9 | 59.3 |
| 337_FDSW210097850-1r | 1 | 4411532 | 11179269 | 4377272 | 99.2234 | 379.824 | 35.9 | 59.2 |
| 343_FDSW210068530-1r | 1 | 4411532 | 6521856 | 4379688 | 99.2782 | 221.554 | 36.5 | 59 |
| 344_FDSW210068531-1r | 1 | 4411532 | 7229882 | 4373847 | 99.1458 | 245.615 | 36.5 | 59.1 |
| 345_FDSW210097852-1r | 1 | 4411532 | 5246482 | 4379595 | 99.2761 | 178.224 | 35.9 | 59.1 |
| 346_FDSW210068533-1r | 1 | 4411532 | 7631432 | 4380618 | 99.2992 | 259.236 | 36.4 | 59 |
| 347_FDSW210068534-1r | 1 | 4411532 | 6794244 | 4378314 | 99.247 | 230.813 | 36.5 | 59 |
| 364_FDSW210068536-1r | 1 | 4411532 | 8913450 | 4374913 | 99.1699 | 302.807 | 36.5 | 59 |
| 368_FDSW210097888-1r | 1 | 4411532 | 5270951 | 4380089 | 99.2873 | 179.056 | 35.9 | 59.2 |
| 369_FDSW210097853-1r | 1 | 4411532 | 5997096 | 4370235 | 99.0639 | 203.744 | 36 | 59.2 |
| 371_FDSW210068539-1r | 1 | 4411532 | 7819347 | 4370251 | 99.0642 | 265.608 | 36.5 | 59.2 |
| 372_FDSW210097855-1r | 1 | 4411532 | 3851355 | 4372696 | 99.1197 | 130.831 | 36 | 59.1 |
| 373_FDSW210097856-1r | 1 | 4411532 | 5287673 | 4405631 | 99.8662 | 179.678 | 35.8 | 59.2 |
| 374_FDSW210097857-1r | 1 | 4411532 | 10800064 | 4380529 | 99.2972 | 366.919 | 36 | 59.1 |
| 376_FDSW210097859-1r | 1 | 4411532 | 5710219 | 4380057 | 99.2865 | 194.003 | 36 | 59 |
| 377_FDSW210097860-1r | 1 | 4411532 | 10926208 | 4372499 | 99.1152 | 371.196 | 35.9 | 59.1 |
| 379_FDSW210097861-1r | 1 | 4411532 | 5413212 | 4375928 | 99.1929 | 183.906 | 36 | 59.1 |
| 381_FDSW210068548-1r | 1 | 4411532 | 7440697 | 4354252 | 98.7016 | 252.721 | 36.5 | 59.1 |
| 382_FDSW210097862-1r | 1 | 4411532 | 10484553 | 4380804 | 99.3035 | 356.235 | 35.9 | 59.1 |
| 383_FDSW210146978-1r | 1 | 4411532 | 8163119 | 4401685 | 99.7768 | 266.079 | 36.4 | 59.1 |
| 385_FDSW210146979-1r | 1 | 4411532 | 9527030 | 4367958 | 99.0123 | 310.589 | 36.4 | 58.9 |
| 386_FDSW210146980-1r | 1 | 4411532 | 8170073 | 4380422 | 99.2948 | 266.782 | 36.5 | 58.9 |
| 387_FDSW210146981-1r | 1 | 4411532 | 10880805 | 4379869 | 99.2823 | 353.68 | 36.3 | 59.1 |
| 389_FDSW210146982-1r | 1 | 4411532 | 9799616 | 4380011 | 99.2855 | 319.465 | 36.4 | 58.9 |
| 391_FDSW210097863-1a | 1 | 4411532 | 10068722 | 4379890 | 99.2827 | 342.225 | 35.7 | 59.1 |
| 392_FDSW210146984-1r | 1 | 4411532 | 6051812 | 4354427 | 98.7056 | 196.709 | 36.2 | 59.1 |
| 393_FDSW210146985-1r | 1 | 4411532 | 9716161 | 4390708 | 99.528 | 316.304 | 36.3 | 59.2 |
| 394_FDSW210146986-1r | 1 | 4411532 | 8903203 | 4402515 | 99.7956 | 289.825 | 36.3 | 59.2 |
| 396_FDSW210146987-1r | 1 | 4411532 | 9090705 | 4379930 | 99.2837 | 296.157 | 36.4 | 58.9 |
| 397_FDSW210097865-1r | 1 | 4411532 | 6007604 | 4377025 | 99.2178 | 204.12 | 36 | 59.1 |
| 399_FDSW210097867-1r | 1 | 4411532 | 5423621 | 4380342 | 99.293 | 184.226 | 36 | 59 |
| 400_FDSW210097868-1r | 1 | 4411532 | 5981367 | 4377407 | 99.2265 | 203.181 | 35.9 | 59.1 |
| 404_FDSW210097871-1r | 1 | 4411532 | 10780150 | 4378880 | 99.2598 | 366.249 | 35.9 | 59 |
| 405_FDSW210097872-1r | 1 | 4411532 | 5327859 | 4381797 | 99.326 | 180.999 | 35.9 | 59.1 |
| 407_FDSW210097873-1r | 1 | 4411532 | 5259689 | 4386156 | 99.4248 | 178.729 | 35.9 | 59.3 |
| 408_FDSW210097874-1r | 1 | 4411532 | 10617410 | 4381009 | 99.3081 | 360.75 | 36 | 59 |
| 411_FDSW210146988-1r | 1 | 4411532 | 9544652 | 4399645 | 99.7305 | 311.307 | 36.4 | 59.2 |
| 412_FDSW210097877-1r | 1 | 4411532 | 5765031 | 4373206 | 99.1312 | 195.853 | 35.9 | 59.1 |
| 414_FDSW210097878-1r | 1 | 4411532 | 11238589 | 4384982 | 99.3982 | 381.821 | 35.9 | 59.3 |
| 416_FDSW210097880-1r | 1 | 4411532 | 5762044 | 4374232 | 99.1545 | 195.713 | 35.9 | 59.1 |
| 420_FDSW210097882-1r | 1 | 4411532 | 11416750 | 4402033 | 99.7847 | 387.886 | 35.9 | 59.3 |
| 421_FDSW210097883-1r | 1 | 4411532 | 5507065 | 4387248 | 99.4495 | 187.101 | 35.9 | 59.2 |
| 423_FDSW210097886-1r | 1 | 4411532 | 5478938 | 4378948 | 99.2614 | 186.14 | 36 | 59.1 |
| 428_FDSW210097887-1r | 1 | 4411532 | 5364596 | 4399231 | 99.7212 | 182.287 | 35.9 | 59.5 |
| S079_uni-medica-A_UM191025T0019_AH5KNCCCX2_S79_L003 | 1 | 4411532 | 8928475 | 4384766 | 99.3933 | 284.033 | 40.2 | 58.9 |
| S080_uni-medica-A_UM191025T0020_AH5KNCCCX2_S80_L003 | 1 | 4411532 | 5933096 | 4381458 | 99.3183 | 189.752 | 40.2 | 59 |
| S081_uni-medica-A_UM191025T0021_AH5KNCCCX2_S81_L003 | 1 | 4411532 | 8079568 | 4383081 | 99.3551 | 257.553 | 40.2 | 59.1 |
| S082_uni-medica-A_UM191025T0022_AH5KNCCCX2_S82_L003 | 1 | 4411532 | 8718133 | 4409550 | 99.9551 | 275.531 | 40.2 | 59.2 |
| S083_uni-medica-A_UM191025T0023_AH5KNCCCX2_S83_L003 | 1 | 4411532 | 8019300 | 4381835 | 99.3268 | 254.078 | 40.2 | 59 |
| S084_uni-medica-A_UM191025T0024_AH5KNCCCX2_S84_L003 | 1 | 4411532 | 7391530 | 4383234 | 99.3585 | 233.488 | 40.2 | 59.1 |
| S085_uni-medica-A_UM191025T0025_AH5KNCCCX2_S85_L003 | 1 | 4411532 | 6538279 | 4382278 | 99.3369 | 208.142 | 40.2 | 59.1 |
| S086_uni-medica-A_UM191025T0026_AH5KNCCCX2_S86_L003 | 1 | 4411532 | 7092658 | 4379550 | 99.275 | 225.925 | 40.2 | 59 |
| S087_uni-medica-A_UM191025T0027_AH5KNCCCX2_S87_L003 | 1 | 4411532 | 6850443 | 4397047 | 99.6717 | 218.176 | 40.2 | 59.3 |
| S088_uni-medica-A_UM191025T0028_AH5KNCCCX2_S88_L003 | 1 | 4411532 | 7636782 | 4382244 | 99.3361 | 243.986 | 40.2 | 59.1 |
| S089_uni-medica-A_UM191025T0029_AH5KNCCCX2_S89_L003 | 1 | 4411532 | 6909749 | 4382038 | 99.3314 | 220.373 | 40.2 | 59 |
| S090_uni-medica-A_UM191025T0030_AH5KNCCCX2_S90_L003 | 1 | 4411532 | 3286381 | 4382437 | 99.3405 | 105.639 | 40.2 | 59 |
| S091_uni-medica-A_UM191025T0031_AH5KNCCCX2_S91_L003 | 1 | 4411532 | 6605401 | 4381775 | 99.3255 | 210.808 | 40.2 | 59.1 |
| S094_uni-medica-A_UM191025T0034_AH5KNCCCX2_S94_L003 | 1 | 4411532 | 6763766 | 4409101 | 99.9449 | 215.69 | 40.2 | 59.2 |
| S095_uni-medica-A_UM191025T0035_AH5KNCCCX2_S95_L003 | 1 | 4411532 | 6947096 | 4399614 | 99.7298 | 220.162 | 40.2 | 59.2 |
| S096_uni-medica-A_UM191025T0036_AH5KNCCCX2_S96_L003 | 1 | 4411532 | 8203059 | 4386502 | 99.4326 | 260.218 | 40.2 | 59 |
| S097_uni-medica-A_UM191025T0037_AH5KNCCCX2_S97_L003 | 1 | 4411532 | 8479688 | 4385024 | 99.3991 | 270.08 | 40.2 | 58.9 |
| S098_uni-medica-A_UM191025T0038_AH5KNCCCX2_S98_L003 | 1 | 4411532 | 7849286 | 4382669 | 99.3457 | 248.342 | 40.2 | 59 |
| S099_uni-medica-A_UM191025T0039_AH5KNCCCX2_S99_L003 | 1 | 4411532 | 7747287 | 4380509 | 99.2968 | 246.597 | 40.2 | 58.9 |
| S100_uni-medica-A_UM191025T0040_AH5KNCCCX2_S100_L003 | 1 | 4411532 | 7967621 | 4396359 | 99.6561 | 253.58 | 40.2 | 59.3 |
| S101_uni-medica-A_UM191025T0041_AH5KNCCCX2_S101_L003 | 1 | 4411532 | 7807664 | 4383623 | 99.3674 | 247.924 | 40.2 | 59.1 |
| S102_uni-medica-A_UM191025T0042_AH5KNCCCX2_S102_L003 | 1 | 4411532 | 8683895 | 4382050 | 99.3317 | 275.675 | 40.2 | 59 |
| S103_uni-medica-A_UM191025T0043_AH5KNCCCX2_S103_L003 | 1 | 4411532 | 8004504 | 4381529 | 99.3199 | 253.87 | 40.2 | 59 |
| S104_uni-medica-A_UM191025T0044_AH5KNCCCX2_S104_L003 | 1 | 4411532 | 7542585 | 4383558 | 99.3659 | 240.537 | 40.2 | 59 |
| S105_uni-medica-A_UM191025T0045_AH5KNCCCX2_S105_L003 | 1 | 4411532 | 6788919 | 4383466 | 99.3638 | 216.698 | 40.2 | 58.8 |
| S106_uni-medica-A_UM191025T0046_AH5KNCCCX2_S106_L003 | 1 | 4411532 | 7170369 | 4384150 | 99.3793 | 227.795 | 40.2 | 59 |
| S107_uni-medica-A_UM191025T0047_AH5KNCCCX2_S107_L003 | 1 | 4411532 | 8480896 | 4386347 | 99.4291 | 268.427 | 40.2 | 58.9 |
| S108_uni-medica-A_UM191025T0048_AH5KNCCCX2_S108_L003 | 1 | 4411532 | 7375590 | 4394294 | 99.6093 | 234.576 | 40.2 | 59.3 |
| S109_uni-medica-A_UM191025T0049_AH5KNCCCX2_S109_L003 | 1 | 4411532 | 9122933 | 4383506 | 99.3647 | 289.577 | 40.2 | 58.9 |
| S110_uni-medica-A_UM191025T0050_AH5KNCCCX2_S110_L003 | 1 | 4411532 | 6963020 | 4385600 | 99.4122 | 221.832 | 40.2 | 59 |
| S111_uni-medica-A_UM191025T0051_AH5KNCCCX2_S111_L003 | 1 | 4411532 | 8906660 | 4381527 | 99.3199 | 283.592 | 40.2 | 59 |
| S112_uni-medica-A_UM191025T0052_AH5KNCCCX2_S112_L003 | 1 | 4411532 | 8804645 | 4386279 | 99.4276 | 281.191 | 40.2 | 58.9 |
| S113_uni-medica-A_UM191025T0053_AH5KNCCCX2_S113_L003 | 1 | 4411532 | 9041445 | 4385197 | 99.403 | 288.082 | 40.2 | 58.9 |
| S114_uni-medica-A_UM191025T0054_AH5KNCCCX2_S114_L003 | 1 | 4411532 | 8322096 | 4383991 | 99.3757 | 265.204 | 40.2 | 59 |
| S115_uni-medica-A_UM191025T0055_AH5KNCCCX2_S115_L003 | 1 | 4411532 | 8780540 | 4385755 | 99.4157 | 278.743 | 40.2 | 59 |
| S116_uni-medica-A_UM191025T0056_AH5KNCCCX2_S116_L003 | 1 | 4411532 | 8239151 | 4382876 | 99.3504 | 261.033 | 40.2 | 59.1 |
| S119_uni-medica-A_UM191025T0059_AH5KNCCCX2_S119_L003 | 1 | 4411532 | 8040704 | 4394703 | 99.6185 | 255.928 | 40.2 | 59.2 |
| S120_uni-medica-A_UM191025T0060_AH5KNCCCX2_S120_L003 | 1 | 4411532 | 8599699 | 4409988 | 99.965 | 274.48 | 40.1 | 59.2 |
| UM200102T-UM200102T0001_L3 | 1 | 4411532 | 6786169 | 4381050 | 99.309 | 217.434 | 36.3 | 59 |
| UM200102T-UM200102T0002_L3 | 1 | 4411532 | 6533650 | 4380676 | 99.3006 | 209.082 | 36.3 | 58.9 |
| UM200102T-UM200102T0003_L3 | 1 | 4411532 | 8034115 | 4407743 | 99.9141 | 257.835 | 36.3 | 59.1 |
| UM200102T-UM200102T0004_L3 | 1 | 4411532 | 8476943 | 4378033 | 99.2406 | 271.562 | 36.3 | 59 |
| UM200102T-UM200102T0005_L3 | 1 | 4411532 | 5783231 | 4381037 | 99.3087 | 186.284 | 36.2 | 59 |
| UM200102T-UM200102T0006_L3 | 1 | 4411532 | 4966112 | 4381405 | 99.3171 | 158.898 | 36.3 | 59 |
| UM200102T-UM200102T0008_L3 | 1 | 4411532 | 5616741 | 4375540 | 99.1841 | 179.277 | 36.3 | 59 |
| UM200102T-UM200102T0013_L3 | 1 | 4411532 | 6686045 | 4381375 | 99.3164 | 215.991 | 36.2 | 59 |
| UM200102T-UM200102T0014_L3 | 1 | 4411532 | 7137627 | 4374891 | 99.1694 | 230.143 | 36.3 | 59 |
| UM200102T-UM200102T0016_L3 | 1 | 4411532 | 6205110 | 4397369 | 99.679 | 200.125 | 36.3 | 59.3 |
| UM200102T-UM200102T0017_L3 | 1 | 4411532 | 5925618 | 4406808 | 99.8929 | 190.875 | 36.3 | 59.3 |
| UM200102T-UM200102T0018_L3 | 1 | 4411532 | 6982957 | 4380464 | 99.2958 | 224.873 | 36.3 | 58.9 |
| UM200102T-UM200102T0019_L3 | 1 | 4411532 | 7465068 | 4406315 | 99.8817 | 241.044 | 36.3 | 59.2 |
| UM200102T-UM200102T0020_L3 | 1 | 4411532 | 4956734 | 4391115 | 99.5372 | 159.263 | 36.2 | 59.2 |
| UM200102T-UM200102T0021_L3 | 1 | 4411532 | 6760149 | 4382386 | 99.3393 | 218.156 | 36.3 | 58.9 |
| UM200102T-UM200102T0022_L3 | 1 | 4411532 | 5520535 | 4381135 | 99.311 | 177.632 | 36.3 | 58.9 |
| UM200102T-UM200102T0024_L3 | 1 | 4411532 | 6503433 | 4394614 | 99.6165 | 208.941 | 36.3 | 59.1 |
| UM200102T-UM200102T0025_L3 | 1 | 4411532 | 6674849 | 4379052 | 99.2637 | 215.132 | 36.3 | 59.1 |
| UM200102T-UM200102T0026_L3 | 1 | 4411532 | 6330246 | 4382496 | 99.3418 | 204.011 | 36.3 | 59 |
| UM200102T-UM200102T0027_L3 | 1 | 4411532 | 6716871 | 4377229 | 99.2224 | 216.901 | 36.3 | 58.9 |
| UM200102T-UM200102T0028_L3 | 1 | 4411532 | 7566795 | 4377209 | 99.222 | 244.272 | 36.3 | 59 |
| UM200102T-UM200102T0029_L3 | 1 | 4411532 | 7016393 | 4398574 | 99.7063 | 227.232 | 36.3 | 59.1 |
| UM200102T-UM200102T0030_L3 | 1 | 4411532 | 6856818 | 4383326 | 99.3606 | 220.273 | 36.3 | 59 |
| UM200102T-UM200102T0031_L3 | 1 | 4411532 | 5750701 | 4392342 | 99.565 | 185.686 | 36.3 | 59.2 |
| UM200102T-UM200102T0032_L3 | 1 | 4411532 | 5068627 | 4400268 | 99.7447 | 162.673 | 36.3 | 59.2 |
| UM200102T-UM200102T0033_L3 | 1 | 4411532 | 7309627 | 4380184 | 99.2894 | 234.588 | 36.2 | 59 |
| UM200102T-UM200102T0036_L3 | 1 | 4411532 | 7897342 | 4372871 | 99.1236 | 254.411 | 36.3 | 59.1 |
| UM200102T-UM200102T0037_L3 | 1 | 4411532 | 6130711 | 4398071 | 99.6949 | 197.601 | 36.3 | 59.2 |
| UM200102T-UM200102T0039_L3 | 1 | 4411532 | 6440333 | 4380985 | 99.3076 | 207.713 | 36.3 | 59 |
| UM200102T-UM200102T0040_L3 | 1 | 4411532 | 5963291 | 4381420 | 99.3174 | 193.091 | 36.3 | 59 |
| UM200103T-UM200103T0002_L3 | 1 | 4411532 | 6905139 | 4375806 | 99.1902 | 221.698 | 36.3 | 59 |
| UM200103T-UM200103T0005_L3 | 1 | 4411532 | 2302191 | 4371394 | 99.0902 | 74.2351 | 36.2 | 58.9 |
| UM200103T-UM200103T0006_L3 | 1 | 4411532 | 6459418 | 4375277 | 99.1782 | 208.904 | 36.3 | 59 |
| UM200103T-UM200103T0007_L3 | 1 | 4411532 | 5940304 | 4409263 | 99.9486 | 191.861 | 36.3 | 59.2 |
| X101_FDSW210068427-1r | 1 | 4411532 | 7294381 | 4365759 | 98.9624 | 247.82 | 36.5 | 59.1 |
| X2_FDSW210068391-1r | 1 | 4411532 | 8186038 | 4386482 | 99.4322 | 278.109 | 36.5 | 59.4 |
| X21_FDSW210068392-1r | 1 | 4411532 | 7840773 | 4372197 | 99.1084 | 266.359 | 36.5 | 59.1 |
| X25_FDSW210068393-1r | 1 | 4411532 | 5405667 | 4392551 | 99.5697 | 183.665 | 36.5 | 59.2 |
| X29_FDSW210097792-1r | 1 | 4411532 | 5709747 | 4407231 | 99.9025 | 194.009 | 35.8 | 59.3 |
| X52_FDSW210097794-1r | 1 | 4411532 | 6223278 | 4374951 | 99.1708 | 211.416 | 36 | 59.1 |
| X53_FDSW210068397-1r | 1 | 4411532 | 7012980 | 4380711 | 99.3014 | 238.245 | 36.5 | 59.1 |
| X54_FDSW210068398-1r | 1 | 4411532 | 6538722 | 4379131 | 99.2655 | 222.135 | 36.4 | 59.1 |
| X58_FDSW210097795-1r | 1 | 4411532 | 10833824 | 4375344 | 99.1797 | 368.018 | 36 | 59 |
| X59_FDSW210068401-1r | 1 | 4411532 | 8543568 | 4397602 | 99.6842 | 290.292 | 36.5 | 59.3 |
| X64_FDSW210068404-1r | 1 | 4411532 | 7904545 | 4374463 | 99.1597 | 268.481 | 36.4 | 59.1 |
| X65_FDSW210068405-1r | 1 | 4411532 | 8649360 | 4380248 | 99.2909 | 293.829 | 36.4 | 59 |
| X66_FDSW210068406-1r | 1 | 4411532 | 7132312 | 4379809 | 99.2809 | 242.303 | 36.5 | 59 |
| X69_FDSW210068408-1r | 1 | 4411532 | 8501855 | 4406887 | 99.8947 | 288.855 | 36.5 | 59.2 |
| X70_FDSW210068409-1r | 1 | 4411532 | 6802159 | 4407625 | 99.9114 | 231.033 | 36.4 | 59.1 |
| X72_FDSW210068410-1r | 1 | 4411532 | 8316533 | 4378215 | 99.2448 | 282.514 | 36.5 | 59 |
| X73_FDSW210068411-2r | 1 | 4411532 | 7652855 | 4375312 | 99.179 | 259.988 | 36.5 | 59 |
| X74_FDSW210097797-1r | 1 | 4411532 | 11027629 | 4374233 | 99.1545 | 374.656 | 35.9 | 59.1 |
| X75_FDSW210097798-1r | 1 | 4411532 | 5622439 | 4370300 | 99.0654 | 191.012 | 35.9 | 59.2 |
| X76_FDSW210068414-1r | 1 | 4411532 | 7481801 | 4380411 | 99.2946 | 254.131 | 36.5 | 59 |
| X78_FDSW210068416-1r | 1 | 4411532 | 6528782 | 4361327 | 98.862 | 221.808 | 36.4 | 59 |
| X80_FDSW210068417-1r | 1 | 4411532 | 6888069 | 4381391 | 99.3168 | 234.012 | 36.4 | 59.1 |
| X81_FDSW210097800-1r | 1 | 4411532 | 11102682 | 4377311 | 99.2243 | 377.219 | 36 | 59.1 |
| X84_FDSW210068419-1r | 1 | 4411532 | 7564957 | 4377094 | 99.2194 | 257.002 | 36.5 | 59.1 |
| X87_FDSW210068421-1r | 1 | 4411532 | 7637527 | 4378485 | 99.2509 | 259.485 | 36.4 | 59.4 |
| X88_FDSW210068422-1r | 1 | 4411532 | 7858913 | 4382392 | 99.3395 | 267.033 | 36.4 | 59.3 |
| X91_FDSW210068423-1r | 1 | 4411532 | 7812148 | 4377834 | 99.2361 | 265.368 | 36.4 | 59 |
| X97_FDSW210097802-1r | 1 | 4411532 | 5566886 | 4374954 | 99.1709 | 189.119 | 35.8 | 59 |
| X99_FDSW210097803-1b | 1 | 4411532 | 7683602 | 4371360 | 99.0894 | 261.034 | 36.2 | 59.1 |

**Supplementary Table 4** Whole-genome sequencing Results of 208 *Mycobacterium tuberculosis* strains.

| Number | sample for WGS | main_lineage | sub_lineage | num_dr_variants | num_other_variants | rifampicin | isoniazid | ethambutol | moxifloxacin | levofloxacin | amikacin | prothionamide |
| --- | --- | --- | --- | --- | --- | --- | --- | --- | --- | --- | --- | --- |
| 104 | 102_FDSW210068428-1r.tbprofiler | lineage2 | lineage2.2.1 | 0 | 17 | - | - | - | - | - | - | - |
| 105 | 103_FDSW210068429-1r.tbprofiler | lineage2 | lineage2.2.1 | 0 | 19 | - | - | - | - | - | - | - |
| 106 | 105_FDSW210097805-1r.tbprofiler | lineage2 | lineage2.2.1 | 0 | 21 | - | - | - | - | - | - | - |
| 187 | 108_FDSW210146955-1r.tbprofiler | lineage2 | lineage2.2.1 | 4 | 21 | rpoB_p.Ser450Leu, rpoC_p.Leu527Val | katG_p.Ser315Thr | embB_p.Met306Val | - | - | - | - |
| 107 | 113_FDSW210097807-1r.tbprofiler | lineage4 | lineage4.5 | 1 | 13 | - | ahpC_c.-54C>T | - | - | - | - | - |
| 108 | 117_FDSW210068435-1r.tbprofiler | lineage4 | lineage4.5 | 0 | 12 | - | - | - | - | - | - | - |
| 109 | 118_FDSW210068436-1r.tbprofiler | lineage2 | lineage2.2.1 | 0 | 22 | - | - | - | - | - | - | - |
| 110 | 120_FDSW210068438-1r.tbprofiler | lineage4 | lineage4.5 | 0 | 11 | - | - | - | - | - | - | - |
| 111 | 124_FDSW210097808-1r.tbprofiler | lineage2 | lineage2.2.1 | 0 | 24 | - | - | - | - | - | - | - |
| 112 | 125_FDSW210097809-1r.tbprofiler | lineage2 | lineage2.2.1 | 0 | 20 | - | - | - | - | - | - | - |
| 113 | 126_FDSW210097810-1r.tbprofiler | lineage2 | lineage2.2.1 | 1 | 20 | - | - | - | - | - | - | - |
| 114 | 128_FDSW210097811-1r.tbprofiler | lineage2 | lineage2.2.1 | 0 | 17 | - | - | - | - | - | - | - |
| 115 | 130_FDSW210068442-1r.tbprofiler | lineage4 | lineage4 | 1 | 13 | - | - | - | gyrB_p.Asn499Asp | gyrB_p.Asn499Asp | - | - |
| 116 | 131_FDSW210097812-1r.tbprofiler | lineage2 | lineage2.2.1 | 0 | 19 | - | - | - | - | - | - | - |
| 117 | 147_FDSW210068445-1r.tbprofiler | lineage4 | lineage4.5 | 0 | 16 | - | - | - | - | - | - | - |
| 118 | 149_FDSW210097815-1r.tbprofiler | lineage2 | lineage2.2.1 | 5 | 20 | rpoB_p.Asp435Ala, rpoB_p.Leu452Pro | katG_p.Ser315Thr | - | - | - | - | - |
| 119 | 150_FDSW210097816-1r.tbprofiler | lineage2 | lineage2.2.1 | 1 | 20 | - | - | - | gyrA_p.Asp94Gly | gyrA_p.Asp94Gly | - | - |
| 120 | 151_FDSW210097817-1r.tbprofiler | lineage2 | lineage2.2.1 | 0 | 23 | - | - | - | - | - | - | - |
| 121 | 167_FDSW210097819-1r.tbprofiler | lineage2 | lineage2.2.1 | 0 | 21 | - | - | - | - | - | - | - |
| 122 | 171_FDSW210068451-1r.tbprofiler | lineage4 | lineage4.5 | 0 | 11 | - | - | - | - | - | - | - |
| 123 | 172_FDSW210068452-1r.tbprofiler | lineage4 | lineage4.5 | 0 | 12 | - | - | - | - | - | - | - |
| 125 | 174_FDSW210097820-1r.tbprofiler | lineage2 | lineage2.2.1 | 1 | 20 | - | - | - | gyrA_p.Ala90Val | gyrA_p.Ala90Val | - | - |
| 124 | 176_FDSW210097822-1r.tbprofiler | lineage2 | lineage2.2.1 | 1 | 18 | - | - | - | - | - | - | - |
| 126 | 179_FDSW210097824-1r.tbprofiler | lineage4 | lineage4.4 | 0 | 15 | - | - | - | - | - | - | - |
| 188 | 180_FDSW210146956-1r.tbprofiler | lineage2 | lineage2.2.1 | 2 | 20 | - | katG_p.Ser315Thr | - | - | - | - | - |
| 189 | 181_FDSW210146957-1r.tbprofiler | lineage2 | lineage2.2.1 | 0 | 18 | - | - | - | - | - | - | - |
| 127 | 183_FDSW210097825-1r.tbprofiler | lineage2 | lineage2.2.1 | 0 | 19 | - | - | - | - | - | - | - |
| 190 | 184_FDSW210146958-1r.tbprofiler | lineage4 | lineage4.4 | 0 | 13 | - | - | - | - | - | - | - |
| 128 | 187_FDSW210068463-1r.tbprofiler | lineage2 | lineage2.2.1 | 0 | 20 | - | - | - | - | - | - | - |
| 191 | 189_FDSW210146959-1r.tbprofiler | lineage2 | lineage2.2.1 | 0 | 20 | - | - | - | - | - | - | - |
| 129 | 190_FDSW210097827-1r.tbprofiler | lineage2 | lineage2.2.1 | 0 | 20 | - | - | - | - | - | - | - |
| 192 | 192_FDSW210146960-1r.tbprofiler | lineage2 | lineage2.2.1 | 0 | 18 | - | - | - | - | - | - | - |
| 193 | 197_FDSW210146961-1r.tbprofiler | lineage2 | lineage2.2.1 | 0 | 19 | - | - | - | - | - | - | - |
| 40 | 198_FDSW210068471-1r.tbprofiler | lineage2 | lineage2.2.1 | 4 | 26 | rpoB_p.His445Asn | fabG1_c.-15C>T, inhA_p.Ile194Thr | - | - | - | - | fabG1_c.-15C>T, inhA_p.Ile194Thr |
| 194 | 199_FDSW210146962-1r.tbprofiler | lineage2 | lineage2.2.1 | 0 | 20 | - | - | - | - | - | - | - |
| 195 | 204_FDSW210146963-1r.tbprofiler | lineage2 | lineage2.2.1 | 0 | 19 | - | - | - | - | - | - | - |
| 49 | 244_FDSW210068477-1r.tbprofiler | lineage2 | lineage2.2.1 | 0 | 17 | - | - | - | - | - | - | - |
| 208 | 262_FDSW210146964-1r.tbprofiler | lineage2 | lineage2.2.1 | 0 | 21 | - | - | - | - | - | - | - |
| 130 | 273_FDSW210097837-1r.tbprofiler | lineage2 | lineage2.2.1 | 0 | 20 | - | - | - | - | - | - | - |
| 131 | 279_FDSW210097838-1r.tbprofiler | lineage2 | lineage2.2.1 | 0 | 16 | - | - | - | - | - | - | - |
| 196 | 280_FDSW210146968-1r.tbprofiler | lineage2 | lineage2.2.1 | 0 | 17 | - | - | - | - | - | - | - |
| 132 | 283_FDSW210097839-1r.tbprofiler | lineage4 | lineage4.5 | 0 | 11 | - | - | - | - | - | - | - |
| 133 | 285_FDSW210068488-1r.tbprofiler | lineage2 | lineage2.2.1 | 0 | 22 | - | - | - | - | - | - | - |
| 197 | 288_FDSW210146970-1r.tbprofiler | lineage2 | lineage2.2.1 | 0 | 18 | - | - | - | - | - | - | - |
| 198 | 292_FDSW210146974-1r.tbprofiler | lineage2 | lineage2.2.1 | 0 | 18 | - | - | - | - | - | - | - |
| 135 | 293_FDSW210097840-1r.tbprofiler | lineage2 | lineage2.2.1 | 1 | 23 | - | - | - | gyrB_p.Glu501Asp | gyrB_p.Glu501Asp | - | - |
| 134 | 295_FDSW210097841-1r.tbprofiler | lineage2 | lineage2.2.1 | 0 | 20 | - | - | - | - | - | - | - |
| 199 | 296_FDSW210146976-1r.tbprofiler | lineage4 | lineage4.4 | 0 | 15 | - | - | - | - | - | - | - |
| 136 | 298_FDSW210097842-1r.tbprofiler | lineage2 | lineage2.2.1 | 0 | 19 | - | - | - | - | - | - | - |
| 137 | 300_FDSW210068501-1r.tbprofiler | lineage4 | lineage4.5 | 0 | 13 | - | - | - | - | - | - | - |
| 138 | 302_FDSW210068503-1r.tbprofiler | lineage2 | lineage2.2.1 | 0 | 20 | - | - | - | - | - | - | - |
| 139 | 304_FDSW210097845-1r.tbprofiler | lineage2 | lineage2.2.1 | 0 | 20 | - | - | - | - | - | - | - |
| 140 | 306_FDSW210068507-1r.tbprofiler | lineage4 | lineage4.4 | 0 | 17 | - | - | - | - | - | - | - |
| 141 | 308_FDSW210068509-1r.tbprofiler | lineage2 | lineage2.2.1 | 0 | 21 | - | - | - | - | - | - | - |
| 142 | 309_FDSW210097847-1r.tbprofiler | lineage4 | lineage4.4 | 0 | 17 | - | - | - | - | - | - | - |
| 143 | 310_FDSW210068511-1r.tbprofiler | lineage4 | lineage4.4 | 0 | 17 | - | - | - | - | - | - | - |
| 144 | 313_FDSW210068514-1r.tbprofiler | lineage2 | lineage2.2.2 | 0 | 20 | - | - | - | - | - | - | - |
| 145 | 314_FDSW210068515-1r.tbprofiler | lineage4 | lineage4.5 | 0 | 17 | - | - | - | - | - | - | - |
| 146 | 315_FDSW210068516-1r.tbprofiler | lineage4 | lineage4.5 | 0 | 14 | - | - | - | - | - | - | - |
| 147 | 318_FDSW210068519-1r.tbprofiler | lineage2 | lineage2.2.1 | 0 | 19 | - | - | - | - | - | - | - |
| 148 | 319_FDSW210068520-1r.tbprofiler | lineage2 | lineage2.2.1 | 3 | 19 | rpoB_p.Leu430Pro | katG_p.Ser315Thr | - | - | - | - | - |
| 149 | 320_FDSW210097848-1r.tbprofiler | lineage2 | lineage2.2.2 | 0 | 20 | - | - | - | - | - | - | - |
| 150 | 323_FDSW210068524-1r.tbprofiler | lineage2 | lineage2.2.1 | 0 | 19 | - | - | - | - | - | - | - |
| 151 | 325_FDSW210097849-1r.tbprofiler | lineage4 | lineage4.5 | 1 | 13 | - | - | - | - | - | - | - |
| 152 | 337_FDSW210097850-1r.tbprofiler | lineage2 | lineage2.2.2 | 0 | 19 | - | - | - | - | - | - | - |
| 153 | 343_FDSW210068530-1r.tbprofiler | lineage2 | lineage2.2.1 | 0 | 19 | - | - | - | - | - | - | - |
| 154 | 344_FDSW210068531-1r.tbprofiler | lineage2 | lineage2.2.1 | 6 | 20 | rpoB_p.Asp435Tyr, rpoB_p.Asn437Asp | katG_p.Ser315Thr | embB_p.Gly406Ala | - | - | - | - |
| 155 | 345_FDSW210097852-1r.tbprofiler | lineage2 | lineage2.2.1 | 4 | 16 | rpoB_p.Ser450Leu | katG_p.Ser315Thr | embB_p.Gly406Asp | - | - | - | - |
| 156 | 346_FDSW210068533-1r.tbprofiler | lineage2 | lineage2.2.1 | 0 | 20 | - | - | - | - | - | - | - |
| 157 | 347_FDSW210068534-1r.tbprofiler | lineage2 | lineage2.2.1 | 0 | 18 | - | - | - | - | - | - | - |
| 158 | 364_FDSW210068536-1r.tbprofiler | lineage2 | lineage2.2.1 | 3 | 18 | rpoB_p.His445Asp | katG_p.Ser315Thr | - | - | - | - | - |
| 159 | 368_FDSW210097888-1r.tbprofiler | lineage2 | lineage2.2.1 | 0 | 21 | - | - | - | - | - | - | - |
| 160 | 369_FDSW210097853-1r.tbprofiler | lineage2 | lineage2.2.2 | 0 | 20 | - | - | - | - | - | - | - |
| 161 | 371_FDSW210068539-1r.tbprofiler | lineage2 | lineage2.2.2 | 0 | 20 | - | - | - | - | - | - | - |
| 162 | 372_FDSW210097855-1r.tbprofiler | lineage2 | lineage2.2.1 | 1 | 16 | - | fabG1_c.-15C>T | - | - | - | - | fabG1_c.-15C>T |
| 163 | 373_FDSW210097856-1r.tbprofiler | lineage4 | lineage4.4 | 0 | 16 | - | - | - | - | - | - | - |
| 164 | 374_FDSW210097857-1r.tbprofiler | lineage2 | lineage2.2.1 | 0 | 18 | - | - | - | - | - | - | - |
| 165 | 376_FDSW210097859-1r.tbprofiler | lineage2 | lineage2.2.1 | 5 | 23 | rpoB_p.Ser450Leu | katG_p.Ser315Thr | embB_p.Met306Val | - | - | - | - |
| 166 | 377_FDSW210097860-1r.tbprofiler | lineage2 | lineage2.2.1 | 0 | 20 | - | - | - | - | - | - | - |
| 167 | 379_FDSW210097861-1r.tbprofiler | lineage2 | lineage2.2.1 | 0 | 19 | - | - | - | - | - | - | - |
| 168 | 381_FDSW210068548-1r.tbprofiler | lineage2 | lineage2.2.1 | 2 | 24 | - | - | embA_c.-12C>T, embB_p.Met306Leu | - | - | - | - |
| 169 | 382_FDSW210097862-1r.tbprofiler | lineage2 | lineage2.2.1 | 1 | 18 | - | - | - | - | - | - | - |
| 170 | 383_FDSW210146978-1r.tbprofiler | lineage4 | lineage4.5 | 0 | 25 | - | - | - | - | - | - | - |
| 200 | 385_FDSW210146979-1r.tbprofiler | lineage2 | lineage2.2.1 | 5 | 19 | rpoB_p.Ser450Leu | katG_p.Ser315Thr | embB_p.Met306Val | - | - | - | - |
| 201 | 386_FDSW210146980-1r.tbprofiler | lineage2 | lineage2.2.1 | 0 | 19 | - | - | - | - | - | - | - |
| 171 | 387_FDSW210146981-1r.tbprofiler | lineage2 | lineage2.2.1 | 0 | 19 | - | - | - | - | - | - | - |
| 202 | 389_FDSW210146982-1r.tbprofiler | lineage2 | lineage2.2.1 | 0 | 16 | - | - | - | - | - | - | - |
| 172 | 391_FDSW210097863-1a.tbprofiler | lineage2 | lineage2.2.1 | 0 | 19 | - | - | - | - | - | - | - |
| 203 | 392_FDSW210146984-1r.tbprofiler | lineage2 | lineage2.2.1 | 0 | 20 | - | - | - | - | - | - | - |
| 204 | 393_FDSW210146985-1r.tbprofiler | lineage4 | lineage4.5 | 0 | 15 | - | - | - | - | - | - | - |
| 205 | 394_FDSW210146986-1r.tbprofiler | lineage4 | lineage4.5 | 0 | 13 | - | - | - | - | - | - | - |
| 206 | 396_FDSW210146987-1r.tbprofiler | lineage2 | lineage2.2.1 | 1 | 16 | - | - | - | gyrA_p.Ala90Val | gyrA_p.Ala90Val | - | - |
| 173 | 397_FDSW210097865-1r.tbprofiler | lineage2 | lineage2.2.1 | 0 | 20 | - | - | - | - | - | - | - |
| 174 | 399_FDSW210097867-1r.tbprofiler | lineage2 | lineage2.2.1 | 4 | 18 | - | katG_p.Ser315Thr | - | - | - | - | - |
| 175 | 400_FDSW210097868-1r.tbprofiler | lineage2 | lineage2.2.1 | 1 | 23 | - | katG_p.Ser315Thr | - | - | - | - | - |
| 177 | 404_FDSW210097871-1r.tbprofiler | lineage2 | lineage2.2.1 | 0 | 22 | - | - | - | - | - | - | - |
| 178 | 405_FDSW210097872-1r.tbprofiler | lineage2 | lineage2.2.1 | 1 | 20 | - | - | - | - | - | - | ethA_p.Gln347* |
| 176 | 407_FDSW210097873-1r.tbprofiler | lineage4 | lineage4.5 | 0 | 12 | - | - | - | - | - | - | - |
| 179 | 408_FDSW210097874-1r.tbprofiler | lineage2 | lineage2.2.1 | 0 | 18 | - | - | - | - | - | - | - |
| 207 | 411_FDSW210146988-1r.tbprofiler | lineage4 | lineage4.5 | 0 | 16 | - | - | - | - | - | - | - |
| 180 | 412_FDSW210097877-1r.tbprofiler | lineage2 | lineage2.2.1 | 0 | 18 | - | - | - | - | - | - | - |
| 181 | 414_FDSW210097878-1r.tbprofiler | lineage4 | lineage4.5 | 0 | 10 | - | - | - | - | - | - | - |
| 182 | 416_FDSW210097880-1r.tbprofiler | lineage2 | lineage2.2.1 | 0 | 21 | - | - | - | - | - | - | - |
| 183 | 420_FDSW210097882-1r.tbprofiler | lineage4 | lineage4.5 | 0 | 13 | - | - | - | - | - | - | - |
| 184 | 421_FDSW210097883-1r.tbprofiler | lineage4 | lineage4.4 | 0 | 16 | - | - | - | - | - | - | - |
| 185 | 423_FDSW210097886-1r.tbprofiler | lineage2 | lineage2.2.1 | 0 | 23 | - | - | - | - | - | - | - |
| 186 | 428_FDSW210097887-1r.tbprofiler | lineage4 | lineage4.4 | 0 | 12 | - | - | - | - | - | - | - |
| 1 | S079_uni-medica-A_UM191025T0019_AH5KNCCCX2_S79_L003.tbprofiler | lineage2 | lineage2.2.1 | 0 | 18 | - | - | - | - | - | - | - |
| 2 | S080_uni-medica-A_UM191025T0020_AH5KNCCCX2_S80_L003.tbprofiler | lineage2 | lineage2.2.1 | 0 | 17 | - | - | - | - | - | - | - |
| 3 | S081_uni-medica-A_UM191025T0021_AH5KNCCCX2_S81_L003.tbprofiler | lineage2 | lineage2.2.1 | 1 | 18 | - | katG_p.Ser315Thr | - | - | - | - | - |
| 4 | S082_uni-medica-A_UM191025T0022_AH5KNCCCX2_S82_L003.tbprofiler | lineage4 | lineage4.4 | 0 | 10 | - | - | - | - | - | - | - |
| 5 | S083_uni-medica-A_UM191025T0023_AH5KNCCCX2_S83_L003.tbprofiler | lineage2 | lineage2.2.1 | 0 | 17 | - | - | - | - | - | - | - |
| 6 | S084_uni-medica-A_UM191025T0024_AH5KNCCCX2_S84_L003.tbprofiler | lineage2 | lineage2.2.1 | 0 | 18 | - | - | - | - | - | - | - |
| 7 | S085_uni-medica-A_UM191025T0025_AH5KNCCCX2_S85_L003.tbprofiler | lineage2 | lineage2.2.1 | 0 | 19 | - | - | - | - | - | - | - |
| 8 | S086_uni-medica-A_UM191025T0026_AH5KNCCCX2_S86_L003.tbprofiler | lineage2 | lineage2.2.1 | 0 | 18 | - | - | - | - | - | - | - |
| 9 | S087_uni-medica-A_UM191025T0027_AH5KNCCCX2_S87_L003.tbprofiler | lineage4 | lineage4.4 | 0 | 11 | - | - | - | - | - | - | - |
| 10 | S088_uni-medica-A_UM191025T0028_AH5KNCCCX2_S88_L003.tbprofiler | lineage2 | lineage2.2.1 | 2 | 20 | - | katG_p.Ser315Thr | - | - | - | - | - |
| 11 | S089_uni-medica-A_UM191025T0029_AH5KNCCCX2_S89_L003.tbprofiler | lineage2 | lineage2.2.1 | 0 | 20 | - | - | - | - | - | - | - |
| 12 | S090_uni-medica-A_UM191025T0030_AH5KNCCCX2_S90_L003.tbprofiler | lineage2 | lineage2.2.1 | 0 | 19 | - | - | - | - | - | - | - |
| 13 | S091_uni-medica-A_UM191025T0031_AH5KNCCCX2_S91_L003.tbprofiler | lineage2 | lineage2.2.1 | 0 | 19 | - | - | - | - | - | - | - |
| 14 | S094_uni-medica-A_UM191025T0034_AH5KNCCCX2_S94_L003.tbprofiler | lineage4 | lineage4.4 | 0 | 14 | - | - | - | - | - | - | - |
| 15 | S095_uni-medica-A_UM191025T0035_AH5KNCCCX2_S95_L003.tbprofiler | lineage4 | lineage4.2.2 | 0 | 16 | - | - | - | - | - | - | - |
| 16 | S096_uni-medica-A_UM191025T0036_AH5KNCCCX2_S96_L003.tbprofiler | lineage2 | lineage2.2.1 | 0 | 18 | - | - | - | - | - | - | - |
| 17 | S097_uni-medica-A_UM191025T0037_AH5KNCCCX2_S97_L003.tbprofiler | lineage2 | lineage2.2.1 | 0 | 20 | - | - | - | - | - | - | - |
| 18 | S098_uni-medica-A_UM191025T0038_AH5KNCCCX2_S98_L003.tbprofiler | lineage2 | lineage2.2.1 | 1 | 17 | - | - | - | - | - | - | - |
| 19 | S099_uni-medica-A_UM191025T0039_AH5KNCCCX2_S99_L003.tbprofiler | lineage2 | lineage2.2.1 | 0 | 17 | - | - | - | - | - | - | - |
| 20 | S100_uni-medica-A_UM191025T0040_AH5KNCCCX2_S100_L003.tbprofiler | lineage4 | lineage4.4 | 0 | 11 | - | - | - | - | - | - | - |
| 21 | S101_uni-medica-A_UM191025T0041_AH5KNCCCX2_S101_L003.tbprofiler | lineage2 | lineage2.2.2 | 6 | 24 | rpoB_p.Ser450Leu | katG_p.Ser315Thr | embB_p.Gln497Arg | gyrA_p.Ala90Val, gyrA_p.Ser91Pro | gyrA_p.Ala90Val, gyrA_p.Ser91Pro | - | - |
| 22 | S102_uni-medica-A_UM191025T0042_AH5KNCCCX2_S102_L003.tbprofiler | lineage2 | lineage2.2.1 | 0 | 18 | - | - | - | - | - | - | - |
| 23 | S103_uni-medica-A_UM191025T0043_AH5KNCCCX2_S103_L003.tbprofiler | lineage2 | lineage2.2.1 | 0 | 21 | - | - | - | - | - | - | - |
| 24 | S104_uni-medica-A_UM191025T0044_AH5KNCCCX2_S104_L003.tbprofiler | lineage2 | lineage2.2.1 | 0 | 18 | - | - | - | - | - | - | - |
| 25 | S105_uni-medica-A_UM191025T0045_AH5KNCCCX2_S105_L003.tbprofiler | lineage2 | lineage2.2.1 | 0 | 17 | - | - | - | - | - | - | - |
| 26 | S106_uni-medica-A_UM191025T0046_AH5KNCCCX2_S106_L003.tbprofiler | lineage2 | lineage2.2.1 | 0 | 22 | - | - | - | - | - | - | - |
| 27 | S107_uni-medica-A_UM191025T0047_AH5KNCCCX2_S107_L003.tbprofiler | lineage2 | lineage2.2.1 | 0 | 18 | - | - | - | - | - | - | - |
| 28 | S108_uni-medica-A_UM191025T0048_AH5KNCCCX2_S108_L003.tbprofiler | lineage4 | lineage4.2.2 | 0 | 16 | - | - | - | - | - | - | - |
| 29 | S109_uni-medica-A_UM191025T0049_AH5KNCCCX2_S109_L003.tbprofiler | lineage2 | lineage2.2.1 | 0 | 18 | - | - | - | - | - | - | - |
| 30 | S110_uni-medica-A_UM191025T0050_AH5KNCCCX2_S110_L003.tbprofiler | lineage2 | lineage2.2.1 | 0 | 18 | - | - | - | - | - | - | - |
| 31 | S111_uni-medica-A_UM191025T0051_AH5KNCCCX2_S111_L003.tbprofiler | lineage2 | lineage2.2.1 | 0 | 19 | - | - | - | - | - | - | - |
| 32 | S112_uni-medica-A_UM191025T0052_AH5KNCCCX2_S112_L003.tbprofiler | lineage2 | lineage2.2.1 | 0 | 19 | - | - | - | - | - | - | - |
| 33 | S113_uni-medica-A_UM191025T0053_AH5KNCCCX2_S113_L003.tbprofiler | lineage2 | lineage2.2.1 | 0 | 16 | - | - | - | - | - | - | - |
| 34 | S114_uni-medica-A_UM191025T0054_AH5KNCCCX2_S114_L003.tbprofiler | lineage2 | lineage2.2.1 | 0 | 17 | - | - | - | - | - | - | - |
| 35 | S115_uni-medica-A_UM191025T0055_AH5KNCCCX2_S115_L003.tbprofiler | lineage2 | lineage2.2.1 | 0 | 25 | - | - | - | - | - | - | - |
| 36 | S116_uni-medica-A_UM191025T0056_AH5KNCCCX2_S116_L003.tbprofiler | lineage2 | lineage2.2.2 | 0 | 17 | - | - | - | - | - | - | - |
| 37 | S119_uni-medica-A_UM191025T0059_AH5KNCCCX2_S119_L003.tbprofiler | lineage4 | lineage4 | 1 | 17 | - | - | embB_p.Ser380Asn | - | - | - | - |
| 38 | S120_uni-medica-A_UM191025T0060_AH5KNCCCX2_S120_L003.tbprofiler | lineage4 | lineage4.4 | 0 | 20 | - | - | - | - | - | - | - |
| 41 | UM200102T-UM200102T0001_L3.tbprofiler | lineage2 | lineage2.2.1 | 0 | 18 | - | - | - | - | - | - | - |
| 43 | UM200102T-UM200102T0002_L3.tbprofiler | lineage2 | lineage2.2.1 | 0 | 18 | - | - | - | - | - | - | - |
| 44 | UM200102T-UM200102T0003_L3.tbprofiler | lineage4 | lineage4.5 | 0 | 13 | - | - | - | - | - | - | - |
| 45 | UM200102T-UM200102T0004_L3.tbprofiler | lineage2 | lineage2.2.1 | 0 | 20 | - | - | - | - | - | - | - |
| 46 | UM200102T-UM200102T0005_L3.tbprofiler | lineage2 | lineage2.2.1 | 0 | 18 | - | - | - | - | - | - | - |
| 47 | UM200102T-UM200102T0006_L3.tbprofiler | lineage2 | lineage2.2.1 | 0 | 17 | - | - | - | - | - | - | - |
| 48 | UM200102T-UM200102T0008_L3.tbprofiler | lineage2 | lineage2.2.1 | 1 | 20 | rpoB_p.His445Leu | - | - | - | - | - | - |
| 50 | UM200102T-UM200102T0013_L3.tbprofiler | lineage2 | lineage2.2.1 | 0 | 16 | - | - | - | - | - | - | - |
| 51 | UM200102T-UM200102T0014_L3.tbprofiler | lineage2 | lineage2.2.1 | 0 | 17 | - | - | - | - | - | - | - |
| 52 | UM200102T-UM200102T0016_L3.tbprofiler | lineage4 | lineage4.2.2 | 0 | 9 | - | - | - | - | - | - | - |
| 53 | UM200102T-UM200102T0017_L3.tbprofiler | lineage4 | lineage4.4 | 1 | 21 | rpoB_p.Ser450Leu | - | - | - | - | - | - |
| 54 | UM200102T-UM200102T0018_L3.tbprofiler | lineage2 | lineage2.2.1 | 0 | 18 | - | - | - | - | - | - | - |
| 55 | UM200102T-UM200102T0019_L3.tbprofiler | lineage4 | lineage4.4 | 0 | 16 | - | - | - | - | - | - | - |
| 56 | UM200102T-UM200102T0020_L3.tbprofiler | lineage4 | lineage4.5 | 0 | 24 | - | - | - | - | - | - | - |
| 57 | UM200102T-UM200102T0021_L3.tbprofiler | lineage2 | lineage2.2.1 | 0 | 19 | - | - | - | - | - | - | - |
| 58 | UM200102T-UM200102T0022_L3.tbprofiler | lineage2 | lineage2.2.1 | 0 | 23 | - | - | - | - | - | - | - |
| 60 | UM200102T-UM200102T0024_L3.tbprofiler | lineage4 | lineage4 | 0 | 18 | - | - | - | - | - | - | - |
| 61 | UM200102T-UM200102T0025_L3.tbprofiler | lineage2 | lineage2.2.2 | 0 | 23 | - | - | - | - | - | - | - |
| 62 | UM200102T-UM200102T0026_L3.tbprofiler | lineage2 | lineage2.2.1 | 0 | 16 | - | - | - | - | - | - | - |
| 63 | UM200102T-UM200102T0027_L3.tbprofiler | lineage2 | lineage2.2.1 | 5 | 20 | rpoB_p.Ser450Leu | katG_p.Ser315Thr | embB_p.Gly406Ser | - | - | rrs_r.1401a>g | - |
| 64 | UM200102T-UM200102T0028_L3.tbprofiler | lineage2 | lineage2.2.1 | 0 | 17 | - | - | - | - | - | - | - |
| 39 | UM200102T-UM200102T0029_L3.tbprofiler | lineage2 | lineage2.2.1 | 9 | 20 | rpoB_p.His445Tyr | katG_p.Ser315Thr | embB_p.Met306Val | gyrA_p.Asp94Gly | gyrA_p.Asp94Gly | rrs_r.1401a>g | ethA_c.938_939insT |
| 65 | UM200102T-UM200102T0030_L3.tbprofiler | lineage2 | lineage2.2.1 | 0 | 17 | - | - | - | - | - | - | - |
| 66 | UM200102T-UM200102T0031_L3.tbprofiler | lineage4 | lineage4.5 | 0 | 18 | - | - | - | - | - | - | - |
| 67 | UM200102T-UM200102T0032_L3.tbprofiler | lineage4 | lineage4.2.2 | 0 | 18 | - | - | - | - | - | - | - |
| 42 | UM200102T-UM200102T0033_L3.tbprofiler | lineage2 | lineage2.2.1 | 5 | 19 | rpoB_p.Ser450Leu | katG_p.Ser315Thr | embB_p.Met306Ile | - | - | - | - |
| 68 | UM200102T-UM200102T0036_L3.tbprofiler | lineage2 | lineage2.2.1 | 2 | 17 | - | katG_p.Ser315Thr | - | - | - | - | - |
| 69 | UM200102T-UM200102T0037_L3.tbprofiler | lineage4 | lineage4.2.2 | 0 | 16 | - | - | - | - | - | - | - |
| 70 | UM200102T-UM200102T0039_L3.tbprofiler | lineage2 | lineage2.2.1 | 0 | 15 | - | - | - | - | - | - | - |
| 71 | UM200102T-UM200102T0040_L3.tbprofiler | lineage2 | lineage2.2.1 | 0 | 17 | - | - | - | - | - | - | - |
| 73 | UM200103T-UM200103T0002_L3.tbprofiler | lineage2 | lineage2.2.1 | 0 | 20 | - | - | - | - | - | - | - |
| 75 | UM200103T-UM200103T0005_L3.tbprofiler | lineage2 | lineage2.2.1 | 3 | 1808 | - | katG_p.Ser140Asn | embB_p.Ala356Val | gyrB_p.Thr500Asn | gyrB_p.Thr500Asn | - | - |
| 76 | UM200103T-UM200103T0006_L3.tbprofiler | lineage2 | lineage2.2.1 | 0 | 19 | - | - | - | - | - | - | - |
| 77 | UM200103T-UM200103T0007_L3.tbprofiler | lineage4 | lineage4.4 | 0 | 14 | - | - | - | - | - | - | - |
| 97 | X101_FDSW210068427-1r.tbprofiler | lineage2 | lineage2.2.1 | 0 | 19 | - | - | - | - | - | - | - |
| 80 | X2_FDSW210068391-1r.tbprofiler | lineage4 | lineage4.2.2 | 0 | 10 | - | - | - | - | - | - | - |
| 82 | X21_FDSW210068392-1r.tbprofiler | lineage2 | lineage2.2.1 | 1 | 19 | - | - | - | - | - | - | - |
| 72 | X25_FDSW210068393-1r.tbprofiler | lineage4 | lineage4.4 | 0 | 14 | - | - | - | - | - | - | - |
| 74 | X29_FDSW210097792-1r.tbprofiler | lineage4 | lineage4.4 | 0 | 18 | - | - | - | - | - | - | - |
| 83 | X52_FDSW210097794-1r.tbprofiler | lineage2 | lineage2.2.1 | 0 | 19 | - | - | - | - | - | - | - |
| 84 | X53_FDSW210068397-1r.tbprofiler | lineage2 | lineage2.2.1 | 0 | 18 | - | - | - | - | - | - | - |
| 85 | X54_FDSW210068398-1r.tbprofiler | lineage2 | lineage2.2.1 | 0 | 19 | - | - | - | - | - | - | - |
| 86 | X58_FDSW210097795-1r.tbprofiler | lineage2 | lineage2.2.1 | 0 | 17 | - | - | - | - | - | - | - |
| 87 | X59_FDSW210068401-1r.tbprofiler | lineage4 | lineage4.4 | 0 | 17 | - | - | - | - | - | - | - |
| 88 | X64_FDSW210068404-1r.tbprofiler | lineage2 | lineage2.2.1 | 0 | 21 | - | - | - | - | - | - | - |
| 89 | X65_FDSW210068405-1r.tbprofiler | lineage2 | lineage2.2.1 | 0 | 17 | - | - | - | - | - | - | - |
| 90 | X66_FDSW210068406-1r.tbprofiler | lineage2 | lineage2.2.1 | 1 | 22 | rpoB_p.Leu430Pro | - | - | - | - | - | - |
| 91 | X69_FDSW210068408-1r.tbprofiler | lineage4 | lineage4.4 | 0 | 16 | - | - | - | - | - | - | - |
| 92 | X70_FDSW210068409-1r.tbprofiler | lineage4 | lineage4.5 | 0 | 12 | - | - | - | - | - | - | - |
| 59 | X72_FDSW210068410-1r.tbprofiler | lineage2 | lineage2.2.1 | 3 | 15 | - | katG_p.Ser315Thr | - | - | - | - | ethA_c.140_140del |
| 93 | X73_FDSW210068411-2r.tbprofiler | lineage2 | lineage2.2.1 | 0 | 19 | - | - | - | - | - | - | - |
| 94 | X74_FDSW210097797-1r.tbprofiler | lineage2 | lineage2.2.1 | 0 | 18 | - | - | - | - | - | - | - |
| 95 | X75_FDSW210097798-1r.tbprofiler | lineage2 | lineage2.2.1 | 1 | 19 | - | katG_p.Ser315Thr | - | - | - | - | - |
| 96 | X76_FDSW210068414-1r.tbprofiler | lineage2 | lineage2.2.1 | 1 | 18 | - | - | - | gyrA_p.Asp94Gly | gyrA_p.Asp94Gly | - | - |
| 98 | X78_FDSW210068416-1r.tbprofiler | lineage2 | lineage2.2.1 | 0 | 17 | - | - | - | - | - | - | - |
| 99 | X80_FDSW210068417-1r.tbprofiler | lineage2 | lineage2.2.1 | 0 | 16 | - | - | - | - | - | - | - |
| 100 | X81_FDSW210097800-1r.tbprofiler | lineage2 | lineage2.2.1 | 0 | 17 | - | - | - | - | - | - | - |
| 101 | X84_FDSW210068419-1r.tbprofiler | lineage2 | lineage2.2.1 | 0 | 19 | - | - | - | - | - | - | - |
| 102 | X87_FDSW210068421-1r.tbprofiler | lineage4 | lineage4.2.2 | 0 | 15 | - | - | - | - | - | - | - |
| 103 | X88_FDSW210068422-1r.tbprofiler | lineage4 | lineage4.4 | 0 | 15 | - | - | - | - | - | - | - |
| 78 | X91_FDSW210068423-1r.tbprofiler | lineage2 | lineage2.2.1 | 1 | 18 | - | - | - | gyrA_p.Asp94Gly | gyrA_p.Asp94Gly | - | - |
| 79 | X97_FDSW210097802-1r.tbprofiler | lineage2 | lineage2.2.1 | 1 | 20 | - | - | - | - | - | - | - |
| 81 | X99_FDSW210097803-1b.tbprofiler | lineage2 | lineage2.2.1 | 0 | 18 | - | - | - | - | - | - | - |

**Supplementary Table 5** Clinical data of 208 children with tuberculosis

| Number | Sex | Ethnicity | Age | Province | Residential area：Urban1/Rural2 | Date of first admission | Date of first admission | Known history of contact with TB patients | BCG vaccination | Treatment status | Severe TB | Diagnosis | Treatment | Outcome | Duration of symptoms before treatment(months) |
| --- | --- | --- | --- | --- | --- | --- | --- | --- | --- | --- | --- | --- | --- | --- | --- |
| 1 | female | Han | 10.23561644 | Sichuan | 1 | 2019/1/25 | 2019 | No or not clear | Yes | New case | No | PTB | First line | Recovery | 0.433333333 |
| 2 | male | Han | 10.6739726 | Sichuan | 2 | 2019/1/28 | 2019 | No or not clear | No | New case | Yes | PTB and EPTB | First line | Death or abandon treatment | 2.033333333 |
| 3 | male | Han | 0.224657534 | Chongqing | 2 | 2019/2/8 | 2019 | Yes | Yes | New case | Yes | PTB and EPTB | First line | Recovery | 0.233333333 |
| 4 | male | Han | 1.339726027 | Sichuan | 1 | 2019/3/2 | 2019 | No or not clear | Yes | New case | Yes | PTB | First line | Recovery | 1.633333333 |
| 5 | female | Han | 13.61917808 | Chongqing | 1 | 2019/3/26 | 2019 | Yes | Yes | New case | Yes | PTB and EPTB | First line | Recovery | 2.1 |
| 6 | female | Miao | 13.54520548 | Guizhou | 2 | 2019/3/23 | 2019 | No or not clear | Yes | New case | Yes | PTB and EPTB | First line | Recovery | 2.133333333 |
| 7 | male | Dong | 0.271232877 | Guizhou | 2 | 2019/7/10 | 2019 | No or not clear | Yes | New case | Yes | PTB and EPTB | First and Second line | Recovery | 0.7 |
| 8 | female | Dong | 10.69589041 | Guizhou | 1 | 2019/7/6 | 2019 | Yes | Yes | New case | No | PTB | First line | Recovery | 4.133333333 |
| 9 | male | Tujia | 9.24109589 | Chongqing | 2 | 2019/7/27 | 2019 | No or not clear | Yes | New case | No | PTB and EPTB | First line | Recovery | 1.166666667 |
| 10 | male | Han | 6.21369863 | Chongqing | 2 | 2019/7/30 | 2019 | Yes | Yes | New case | No | PTB | First line | Recovery | 0.366666667 |
| 11 | male | Han | 4.706849315 | Sichuan | 2 | 2019/4/2 | 2019 | No or not clear | Yes | New case | Yes | PTB and EPTB | First and Second line | Recovery | 0.5 |
| 12 | male | Han | 16.10136986 | Sichuan | 2 | 2016/1/16 | 2016 | No or not clear | No | New case | No | PTB | First line | Recovery | 0.566666667 |
| 13 | female | Han | 9.342465753 | Guizhou | 2 | 2019/6/10 | 2019 | Yes | No | New case | No | PTB | First line | Recovery | 2.1 |
| 14 | female | Han | 13.58630137 | Chongqing | 1 | 2019/6/17 | 2019 | No or not clear | Yes | New case | No | PTB | First line | Recovery | 0.8 |
| 15 | female | Han | 11.37260274 | Sichuan | 2 | 2016/12/8 | 2016 | Yes | No | New case | Yes | PTB and EPTB | First line | Recovery | 6.033333333 |
| 16 | male | Han | 1.205479452 | Sichuan | 1 | 2019/9/19 | 2019 | Yes | Yes | New case | Yes | PTB and EPTB | First and Second line | Recovery | 0.7 |
| 17 | male | Han | 4.361643836 | Chongqing | 2 | 2016/1/26 | 2016 | No or not clear | Yes | New case | Yes | PTB and EPTB | First line | Death or abandon treatment | 0.266666667 |
| 18 | male | Han | 0.21369863 | Chongqing | 2 | 2016/2/14 | 2016 | Yes | Yes | New case | Yes | PTB and EPTB | First line | Recovery | 2.333333333 |
| 19 | female | Han | 0.526027397 | Chongqing | 1 | 2019/9/9 | 2019 | Yes | No | New case | Yes | PTB and EPTB | First line | Recovery | 6.133333333 |
| 20 | male | Han | 0.893150685 | Guizhou | 2 | 2019/9/10 | 2019 | Yes | Yes | New case | Yes | PTB and EPTB | First line | Recovery | 0.3 |
| 21 | male | Han | 0.063013699 | Chongqing | 2 | 2019/8/7 | 2019 | Yes | No | New case | Yes | PTB and EPTB | First line | Death or abandon treatment | 0.333333333 |
| 22 | male | Han | 0.197260274 | Sichuan | 2 | 2019/8/9 | 2019 | Yes | Yes | New case | Yes | PTB | First line | Recovery | 0.766666667 |
| 23 | male | Han | 14.5369863 | Chongqing | 1 | 2019/9/12 | 2019 | Yes | Yes | New case | Yes | PTB and EPTB | First line | Recovery | 0.366666667 |
| 24 | male | Han | 3.591780822 | Sichuan | 1 | 2019/8/12 | 2019 | No or not clear | Yes | New case | Yes | PTB and EPTB | First line | Recovery | 0.966666667 |
| 25 | female | Han | 1.528767123 | Chongqing | 2 | 2016/4/7 | 2016 | Yes | Yes | New case | Yes | PTB and EPTB | First and Second line | Recovery | 0.533333333 |
| 26 | male | Han | 12.27123288 | Guizhou | 2 | 2016/1/19 | 2016 | Yes | Yes | New case | Yes | PTB and EPTB | First line | Death or abandon treatment | 0.7 |
| 27 | male | Han | 0.923287671 | Yunan | 2 | 2019/8/19 | 2019 | Yes | Yes | New case | Yes | PTB and EPTB | First line | Recovery | 2.2 |
| 28 | male | Han | 9.208219178 | Sichuan | 2 | 2015/10/21 | 2015 | No or not clear | Yes | New case | No | PTB | First line | Recovery | 0.666666667 |
| 29 | male | Han | 11.74520548 | Sichuan | 2 | 2015/11/2 | 2015 | No or not clear | No | New case | Yes | PTB | First and Second line | Recovery | 3.1 |
| 30 | female | Han | 0.402739726 | Chongqing | 2 | 2015/10/30 | 2015 | No or not clear | Yes | New case | Yes | PTB and EPTB | First and Second line | Recovery | 1.166666667 |
| 31 | female | Han | 0.849315068 | Guizhou | 1 | 2015/11/12 | 2015 | No or not clear | No | New case | No | PTB | First and Second line | Addition of one or two second line drugs for slow recovery | 1.166666667 |
| 32 | male | Han | 7.82739726 | Chongqing | 1 | 2015/11/14 | 2015 | No or not clear | Yes | New case | No | PTB | First line | Recovery | 1 |
| 33 | female | Han | 11.89863014 | Chongqing | 2 | 2015/11/24 | 2015 | Yes | Yes | New case | No | PTB | First line | Recovery | 12.03333333 |
| 34 | female | Han | 8.104109589 | Chongqing | 2 | 2015/12/10 | 2015 | Yes | No | New case | Yes | PTB and EPTB | First line | Recovery | 0.733333333 |
| 35 | male | Han | 14.04657534 | Chongqing | 2 | 2015/11/30 | 2015 | No or not clear | Yes | New case | Yes | PTB and EPTB | First line | Recovery | 0.233333333 |
| 36 | male | Han | 15.47671233 | Chongqing | 2 | 2016/1/27 | 2016 | Yes | Yes | New case | No | PTB | First line | Recovery | 1.066666667 |
| 37 | male | Han | 15.84931507 | Sichuan | 2 | 2015/12/8 | 2015 | No or not clear | Yes | New case | Yes | PTB | First and Second line | Addition of one or two second line drugs for slow recovery | 1.333333333 |
| 38 | female | Han | 5.975342466 | Sichuan | 2 | 2015/12/9 | 2015 | No or not clear | Yes | New case | Yes | PTB and EPTB | First line | Recovery | 0.433333333 |
| 39 | male | Han | 0.095890411 | Chongqing | 2 | 2017/9/15 | 2017 | Yes | No | New case | Yes | PTB and EPTB | Second line | Addition of one or two second line drugs for slow recovery | 0.3 |
| 40 | male | Han | 0.290410959 | Chongqing | 1 | 2019/1/16 | 2019 | Yes | Yes | New case | Yes | PTB and EPTB | Second line | Recovery | 1.033333333 |
| 41 | male | Han | 11.67123288 | Sichuan | 2 | 2015/7/3 | 2015 | No or not clear | Yes | New case | Yes | PTB | First line | Recovery | 0.8 |
| 42 | female | Han | 12.32054795 | Sichuan | 2 | 2016/3/20 | 2016 | No or not clear | No | New case | Yes | PTB and EPTB | First line | Recovery | 6.1 |
| 43 | female | Han | 13.63561644 | Chongqing | 1 | 2015/7/14 | 2015 | No or not clear | No | New case | Yes | PTB and EPTB | First line | Recovery | 0.466666667 |
| 44 | male | Han | 3.331506849 | Sichuan | 1 | 2016/1/5 | 2016 | Yes | Yes | New case | No | PTB | First line | Recovery | 0.766666667 |
| 45 | male | Han | 12.32054795 | Sichuan | 2 | 2016/3/24 | 2016 | No or not clear | No | New case | No | PTB | First line | Recovery | 1.366666667 |
| 46 | male | Han | 0.306849315 | 陕西省 | 1 | 2015/9/13 | 2015 | No or not clear | No | New case | Yes | PTB and EPTB | First line | Death or abandon treatment | 1.666666667 |
| 47 | female | Han | 10.39726027 | Chongqing | 1 | 2015/10/16 | 2015 | No or not clear | Yes | New case | No | PTB | First line | Recovery | 2 |
| 48 | female | Han | 0.22739726 | Sichuan | 1 | 2019/2/23 | 2019 | No or not clear | Yes | New case | Yes | PTB and EPTB | Second line | Death or abandon treatment | 0.766666667 |
| 49 | female | Han | 1.865753425 | Guizhou | 2 | 2019/8/2 | 2019 | Yes | Yes | New case | Yes | PTB and EPTB | First line | Recovery | 1.066666667 |
| 50 | male | Han | 12.89041096 | Guizhou | 2 | 2019/9/30 | 2019 | No or not clear | Yes | New case | No | PTB | First line | Recovery | 1.033333333 |
| 51 | female | Yi | 0.712328767 | Sichuan | 2 | 2019/10/11 | 2019 | No or not clear | No | New case | Yes | PTB and EPTB | First line | Death or abandon treatment | 1.066666667 |
| 52 | male | Han | 13.67671233 | Chongqing | 1 | 2019/10/25 | 2019 | No or not clear | No | New case | No | PTB | First line | Recovery | 0.433333333 |
| 53 | male | Yi | 12.33150685 | Sichuan | 2 | 2019/10/27 | 2019 | No or not clear | No | New case | Yes | PTB and EPTB | Second line | Recovery | 3.033333333 |
| 54 | female | Han | 12.55616438 | Chongqing | 2 | 2019/10/30 | 2019 | No or not clear | Yes | New case | Yes | PTB | First and Second line | Recovery | 1.066666667 |
| 55 | male | Han | 4.320547945 | Sichuan | 2 | 2019/10/31 | 2019 | No or not clear | Yes | New case | No | PTB | First line | Recovery | 2.266666667 |
| 56 | female | Han | 12.92328767 | Sichuan | 2 | 2017/1/19 | 2017 | Yes | Yes | New case | Yes | PTB and EPTB | First line | Recovery | 1.033333333 |
| 57 | male | Han | 11.86849315 | Chongqing | 2 | 2017/1/26 | 2017 | No or not clear | Yes | New case | Yes | PTB and EPTB | First line | Recovery | 2.1 |
| 58 | female | Han | 12.03561644 | Chongqing | 1 | 2016/9/10 | 2016 | No or not clear | Yes | New case | No | PTB | First line | Recovery | 5.933333333 |
| 59 | male | Han | 12.10958904 | Chongqing | 1 | 2017/2/20 | 2017 | Yes | Yes | New case | Yes | PTB | First line | Recovery | 0.133333333 |
| 60 | male | Han | 11.76164384 | Sichuan | 2 | 2017/2/21 | 2017 | No or not clear | Yes | New case | Yes | PTB and EPTB | First line | Recovery | 0.466666667 |
| 61 | male | Tujia | 7.194520548 | Chongqing | 1 | 2017/2/12 | 2017 | No or not clear | Yes | New case | Yes | PTB | First and Second line | Addition of one or two second line drugs for slow recovery | 0.9 |
| 62 | male | Tujia | 13.25479452 | Chongqing | 1 | 2017/7/9 | 2017 | No or not clear | Yes | New case | Yes | PTB and EPTB | First and Second line | Recovery | 0.6 |
| 63 | female | Miao | 15.16986301 | Chongqing | 2 | 2017/5/1 | 2017 | Yes | No | Retreatment | Yes | PTB and EPTB | Second line | Addition of one or two second line drugs for slow recovery | 4 |
| 64 | male | Han | 10.89863014 | Sichuan | 2 | 2017/10/31 | 2017 | No or not clear | Yes | New case | Yes | PTB | First and Second line | Addition of one or two second line drugs for slow recovery | 3.533333333 |
| 65 | female | Han | 2.97260274 | Sichuan | 2 | 2017/10/26 | 2017 | No or not clear | Yes | New case | No | PTB | First line | Recovery | 4.166666667 |
| 66 | female | Bouye | 0.273972603 | Guizhou | 2 | 2018/1/9 | 2018 | No or not clear | No | New case | Yes | PTB and EPTB | First and Second line | Addition of one or two second line drugs for slow recovery | 2.1 |
| 67 | male | Han | 11.22465753 | Guizhou | 2 | 2018/3/3 | 2018 | No or not clear | Yes | New case | Yes | PTB and EPTB | First line | Recovery | 0.3 |
| 68 | male | Han | 5.506849315 | Guizhou | 1 | 2015/12/25 | 2015 | No or not clear | Yes | New case | No | PTB | First line | Recovery | 11.1 |
| 69 | female | Han | 9.095890411 | Chongqing | 2 | 2016/2/22 | 2016 | No or not clear | No | New case | Yes | PTB | First line | Death or abandon treatment | 3.1 |
| 70 | male | Han | 9.671232877 | Guizhou | 2 | 2016/2/16 | 2016 | No or not clear | Yes | New case | Yes | PTB and EPTB | First and Second line | Recovery | 0.633333333 |
| 71 | male | Han | 16.4630137 | Chongqing | 2 | 2016/3/4 | 2016 | Yes | Yes | New case | No | PTB | First line | Recovery | 0.4 |
| 72 | female | Han | 12.14794521 | Chongqing | 2 | 2016/3/4 | 2016 | Yes | Yes | New case | No | PTB | First line | Recovery | 1.033333333 |
| 73 | male | Han | 13.20547945 | Chongqing | 2 | 2016/3/19 | 2016 | No or not clear | Yes | New case | No | PTB | First line | Recovery | 0.333333333 |
| 74 | male | Han | 0.501369863 | Sichuan | 2 | 2016/11/1 | 2016 | Yes | Yes | New case | Yes | PTB and EPTB | First line | Recovery | 0.333333333 |
| 75 | male | Han | 5.8 | Sichuan | 2 | 2016/11/4 | 2016 | No or not clear | Yes | New case | No | PTB | First line | Recovery | 0.7 |
| 76 | female | Han | 0.205479452 | Yunan | 1 | 2016/9/27 | 2016 | Yes | Yes | New case | Yes | PTB and EPTB | Second line | Recovery | 1.2 |
| 77 | male | Han | 6.890410959 | Guizhou | 2 | 2016/12/9 | 2016 | No or not clear | Yes | New case | Yes | PTB and EPTB | First line | Recovery | 0.366666667 |
| 78 | male | Han | 14.76712329 | Sichuan | 2 | 2015/7/23 | 2015 | No or not clear | No | New case | Yes | PTB and EPTB | First line | Recovery | 0.3 |
| 79 | female | Han | 15.00547945 | Chongqing | 2 | 2015/8/26 | 2015 | No or not clear | No | New case | Yes | PTB and EPTB | First line | Recovery | 1.266666667 |
| 80 | male | Tujia | 17.38082192 | Chongqing | 2 | 2015/9/30 | 2015 | No or not clear | No | New case | Yes | PTB and EPTB | First line | Recovery | 12.06666667 |
| 81 | female | Han | 12.3369863 | Sichuan | 2 | 2016/2/17 | 2016 | No or not clear | No | New case | Yes | PTB and EPTB | First line | Recovery | 1.133333333 |
| 82 | female | Yi | 12.49041096 | Guizhou | 2 | 2016/2/9 | 2016 | Yes | Yes | New case | Yes | PTB and EPTB | First line | Recovery | 0.333333333 |
| 83 | male | Han | 6.706849315 | Sichuan | 2 | 2017/1/14 | 2017 | No or not clear | Yes | New case | No | PTB | First line | Recovery | 0.666666667 |
| 84 | male | Yi | 9.063013699 | Guizhou | 2 | 2017/1/15 | 2017 | Yes | No | New case | Yes | PTB and EPTB | First line | Death or abandon treatment | 15 |
| 85 | male | Han | 0.410958904 | Sichuan | 2 | 2017/1/15 | 2017 | Yes | Yes | New case | Yes | PTB and EPTB | First and Second line | Recovery | 1.166666667 |
| 86 | female | Han | 13.44657534 | Chongqing | 1 | 2017/2/5 | 2017 | Yes | Yes | New case | Yes | PTB | First line | Recovery | 6.066666667 |
| 87 | male | Han | 16.02465753 | Guizhou | 2 | 2017/2/9 | 2017 | Yes | Yes | New case | Yes | PTB and EPTB | First line | Recovery | 12.03333333 |
| 88 | male | Han | 8.224657534 | Chongqing | 2 | 2017/2/20 | 2017 | No or not clear | Yes | New case | Yes | PTB and EPTB | First line | Recovery | 3.1 |
| 89 | male | Han | 0.128767123 | Guizhou | 2 | 2017/2/22 | 2017 | No or not clear | Yes | New case | Yes | PTB and EPTB | Second line | Death or abandon treatment | 1.1 |
| 90 | male | Han | 13.49315068 | Chongqing | 1 | 2017/2/25 | 2017 | No or not clear | Yes | New case | No | PTB | First and Second line | Recovery | 6.066666667 |
| 91 | female | Tujia | 3.046575342 | Chongqing | 2 | 2017/2/28 | 2017 | No or not clear | Yes | New case | Yes | PTB and EPTB | First line | Recovery | 0.366666667 |
| 92 | female | Han | 15.13972603 | Chongqing | 1 | 2017/3/3 | 2017 | Yes | No | New case | No | PTB | First line | Recovery | 3 |
| 93 | male | Han | 2.167123288 | Chongqing | 2 | 2017/2/23 | 2017 | Yes | Yes | New case | Yes | PTB and EPTB | First line | Recovery | 12.13333333 |
| 94 | male | Tujia | 11.30410959 | Chongqing | 2 | 2017/2/27 | 2017 | No or not clear | Yes | New case | No | PTB | First and Second line | Recovery | 0.833333333 |
| 95 | female | Han | 7.602739726 | Sichuan | 2 | 2017/3/5 | 2017 | No or not clear | Yes | New case | Yes | PTB and EPTB | First line | Recovery | 0.666666667 |
| 96 | male | Han | 14.13150685 | Sichuan | 2 | 2017/3/28 | 2017 | No or not clear | Yes | New case | Yes | PTB and EPTB | First and Second line | Recovery | 1.033333333 |
| 97 | female | Han | 0.632876712 | Chongqing | 2 | 2017/4/7 | 2017 | No or not clear | Yes | New case | Yes | PTB and EPTB | First and Second line | Recovery | 0.4 |
| 98 | female | Han | 13.77260274 | Sichuan | 2 | 2017/7/3 | 2017 | Yes | Yes | New case | Yes | PTB | First line | Recovery | 0.766666667 |
| 99 | male | Tujia | 12.38082192 | Guizhou | 2 | 2017/7/27 | 2017 | Yes | No | New case | Yes | PTB and EPTB | First and Second line | Death or abandon treatment | 0.333333333 |
| 100 | female | Han | 11.72054795 | Chongqing | 2 | 2017/7/22 | 2017 | No or not clear | Yes | New case | Yes | PTB and EPTB | First and Second line | Recovery | 0.466666667 |
| 101 | female | Han | 10.03287671 | Chongqing | 1 | 2017/10/27 | 2017 | Yes | Yes | New case | No | PTB | First line | Recovery | 2 |
| 102 | male | Miao | 10.75342466 | Chongqing | 2 | 2017/11/12 | 2017 | Yes | Yes | New case | No | PTB | First and Second line | Recovery | 0.433333 |
| 103 | female | Han | 14.29315068 | Sichuan | 2 | 2017/11/29 | 2017 | Yes | No | New case | Yes | PTB and EPTB | First line | Recovery | 0.566666667 |
| 104 | female | Han | 4.42739726 | Guizhou | 2 | 2018/1/4 | 2018 | Yes | Yes | New case | Yes | PTB and EPTB | First line | Recovery | 0.7 |
| 105 | male | Han | 13.20273973 | Sichuan | 2 | 2018/1/1 | 2018 | No or not clear | Yes | New case | Yes | PTB | First and Second line | Recovery | 1.033333333 |
| 106 | male | Han | 7.991780822 | Chongqing | 1 | 2017/12/27 | 2017 | Yes | No | New case | No | PTB | First line | Recovery | 3.133333333 |
| 107 | female | Han | 13.09863014 | Sichuan | 1 | 2018/2/24 | 2018 | Yes | No | New case | No | PTB | First line | Recovery | 6.1 |
| 108 | male | Han | 7.202739726 | Chongqing | 2 | 2018/3/24 | 2018 | Yes | Yes | New case | Yes | PTB and EPTB | First line | Recovery | 0.266666667 |
| 109 | male | Han | 1.610958904 | Sichuan | 2 | 2018/3/27 | 2018 | No or not clear | Yes | New case | Yes | PTB and EPTB | First line | Recovery | 0.633333333 |
| 110 | female | Han | 12.3260274 | Chongqing | 1 | 2018/4/2 | 2018 | Yes | Yes | New case | Yes | PTB | First line | Recovery | 3.066666667 |
| 111 | female | Han | 13.17808219 | Sichuan | 2 | 2018/3/27 | 2018 | No or not clear | No | New case | Yes | PTB and EPTB | First line | Recovery | 0.3 |
| 112 | male | Han | 12.3890411 | Sichuan | 1 | 2018/4/20 | 2018 | Yes | Yes | New case | Yes | PTB | First line | Recovery | 3.033333333 |
| 113 | male | Han | 6.032876712 | Sichuan | 1 | 2018/4/21 | 2018 | No or not clear | Yes | New case | No | PTB | First line | Recovery | 1.1 |
| 114 | male | Han | 15.83561644 | Chongqing | 2 | 2018/4/22 | 2018 | No or not clear | Yes | New case | Yes | PTB and EPTB | First line | Recovery | 3.133333333 |
| 115 | female | Han | 5.210958904 | Guizhou | 2 | 2018/4/3 | 2018 | Yes | Yes | New case | Yes | PTB and EPTB | First and Second line | Recovery | 1 |
| 116 | male | Han | 5.980821918 | Chongqing | 1 | 2018/4/3 | 2018 | No or not clear | Yes | New case | Yes | PTB and EPTB | First and Second line | Recovery | 0.533333333 |
| 117 | male | Han | 13.2 | Chongqing | 2 | 2018/6/6 | 2018 | No or not clear | Yes | New case | Yes | PTB and EPTB | First and Second line | Recovery | 0.566666667 |
| 118 | female | Han | 13.88493151 | Chongqing | 1 | 2018/7/24 | 2018 | No or not clear | No | New case | Yes | PTB and EPTB | First and Second line | Death or abandon treatment | 0.5 |
| 119 | male | Han | 1.687671233 | Hubei | 2 | 2018/7/9 | 2018 | No or not clear | Yes | New case | No | PTB and EPTB | First line | Recovery | 6.266666667 |
| 120 | female | Han | 1.778082192 | Sichuan | 2 | 2018/6/27 | 2018 | No or not clear | Yes | New case | Yes | PTB and EPTB | First line | Death or abandon treatment | 1.6 |
| 121 | female | Han | 0.95890411 | Chongqing | 1 | 2018/9/18 | 2018 | No or not clear | No | New case | No | PTB | First line | Recovery | 0.166666667 |
| 122 | male | Han | 1.509589041 | Guizhou | 1 | 2018/9/25 | 2018 | Yes | Yes | New case | Yes | PTB and EPTB | First line | Recovery | 0.766666667 |
| 123 | female | Han | 13.02191781 | Sichuan | 2 | 2018/10/26 | 2018 | Yes | Yes | New case | Yes | PTB | First line | Recovery | 0.733333333 |
| 124 | female | Han | 13.75616438 | Chongqing | 1 | 2018/10/19 | 2018 | No or not clear | Yes | New case | Yes | PTB | First line | Recovery | 2.066666667 |
| 125 | male | Han | 1.304109589 | Chongqing | 1 | 2018/10/18 | 2018 | Yes | Yes | New case | Yes | PTB and EPTB | First line | Recovery | 1.066666667 |
| 126 | female | Han | 14.68219178 | Chongqing | 1 | 2018/10/28 | 2018 | Yes | Yes | New case | No | PTB | First line | Recovery | 1.2 |
| 127 | male | Han | 12.00821918 | Chongqing | 1 | 2018/12/11 | 2018 | Yes | Yes | New case | Yes | PTB and EPTB | First and Second line | Recovery | 6.1 |
| 128 | female | Han | 3.515068493 | Chongqing | 1 | 2018/12/12 | 2018 | Yes | Yes | New case | No | PTB | First line | Recovery | 1.1 |
| 129 | female | Han | 3.602739726 | Sichuan | 2 | 2018/12/13 | 2018 | No or not clear | Yes | New case | Yes | PTB and EPTB | First line | Recovery | 6.3 |
| 130 | male | Yi | 5.282191781 | Sichuan | 2 | 2019/10/31 | 2019 | No or not clear | Yes | New case | No | PTB | First line | Recovery | 0.566666667 |
| 131 | female | Han | 6.104109589 | Sichuan | 2 | 2019/11/18 | 2019 | No or not clear | No | New case | No | PTB | First line | Recovery | 0.833333333 |
| 132 | male | Dai | 1.802739726 | Yunan | 2 | 2019/12/8 | 2019 | No or not clear | Yes | New case | Yes | PTB and EPTB | First and Second line | Recovery | 0.5 |
| 133 | female | Han | 0.15890411 | Chongqing | 2 | 2019/12/12 | 2019 | Yes | No | New case | Yes | PTB and EPTB | First and Second line | Recovery | 0.566666667 |
| 134 | female | Han | 11.77808219 | Sichuan | 2 | 2020/1/18 | 2020 | No or not clear | Yes | New case | No | PTB and EPTB | First and Second line | Addition of one or two second line drugs for slow recovery | 0.8 |
| 135 | male | Han | 12.44109589 | Sichuan | 1 | 2020/1/17 | 2020 | No or not clear | Yes | New case | Yes | PTB and EPTB | First line | Recovery | 1.066666667 |
| 136 | male | Han | 1.356164384 | Guizhou | 2 | 2020/1/27 | 2020 | No or not clear | No | New case | Yes | PTB and EPTB | First and Second line | Recovery | 1.4 |
| 137 | male | Han | 13.5260274 | Chongqing | 1 | 2020/1/28 | 2020 | No or not clear | Yes | New case | Yes | EPTB | First line | Recovery | 0.966666667 |
| 138 | male | Han | 12.99178082 | Guizhou | 2 | 2020/1/26 | 2020 | No or not clear | Yes | New case | No | PTB | First line | Recovery | 0.6 |
| 139 | female | Han | 15.17260274 | Chongqing | 1 | 2020/2/3 | 2020 | No or not clear | Yes | New case | No | PTB | First line | Recovery | 0.666666667 |
| 140 | male | Han | 15.95890411 | Sichuan | 1 | 2020/2/1 | 2020 | No or not clear | Yes | New case | No | PTB | First line | Recovery | 0.3 |
| 141 | female | Han | 1.873972603 | Guizhou | 2 | 2020/2/27 | 2020 | Yes | No | New case | Yes | PTB and EPTB | First and Second line | Addition of one or two second line drugs for slow recovery | 0.466666667 |
| 142 | female | Han | 6.583561644 | Sichuan | 2 | 2020/1/1 | 2020 | No or not clear | Yes | New case | No | PTB | First line | Recovery | 0.633333333 |
| 143 | male | Han | 7.578082192 | Guizhou | 2 | 2020/2/17 | 2020 | No or not clear | Yes | New case | Yes | PTB and EPTB | First and Second line | Recovery | 1 |
| 144 | female | Han | 13.64931507 | Chongqing | 2 | 2020/3/3 | 2020 | No or not clear | Yes | New case | No | PTB and EPTB | First and Second line | Addition of one or two second line drugs for slow recovery | 1.033333333 |
| 145 | male | Han | 0.380821918 | Chongqing | 2 | 2020/2/17 | 2020 | Yes | Yes | New case | Yes | PTB | First line | Recovery | 0.4 |
| 146 | male | Han | 13.8109589 | Sichuan | 2 | 2020/3/2 | 2020 | No or not clear | Yes | New case | Yes | PTB and EPTB | First and Second line | Recovery | 3.066666667 |
| 147 | male | Han | 6.646575342 | Chongqing | 2 | 2020/2/23 | 2020 | Yes | Yes | New case | Yes | PTB and EPTB | First and Second line | Recovery | 0.566666667 |
| 148 | female | Han | 3.523287671 | Guizhou | 2 | 2020/2/21 | 2020 | Yes | No | New case | Yes | PTB | Second line | Recovery | 0.833333333 |
| 149 | male | Han | 6.501369863 | Yunan | 2 | 2020/2/26 | 2020 | No or not clear | No | New case | Yes | PTB and EPTB | First and Second line | Recovery | 0.366666667 |
| 150 | male | Han | 1.906849315 | Chongqing | 1 | 2020/2/24 | 2020 | No or not clear | Yes | New case | Yes | PTB and EPTB | First line | Recovery | 6.3 |
| 151 | female | Han | 11.44657534 | Sichuan | 2 | 2020/3/13 | 2020 | No or not clear | No | New case | Yes | PTB and EPTB | First line | Recovery | 1.1 |
| 152 | male | Han | 0.750684932 | Guizhou | 2 | 2020/4/4 | 2020 | No or not clear | No | New case | Yes | PTB and EPTB | First and Second line | Recovery | 1.033333333 |
| 153 | female | Han | 2.090410959 | Chongqing | 1 | 2020/4/17 | 2020 | Yes | No | New case | Yes | PTB | First line | Recovery | 1.066666667 |
| 154 | female | Han | 14 | Chongqing | 1 | 2020/4/24 | 2020 | No or not clear | Yes | New case | Yes | PTB and EPTB | Second line | Recovery | 3.1 |
| 155 | female | Han | 14.04383562 | Chongqing | 1 | 2020/4/25 | 2020 | Yes | No | New case | Yes | PTB | Second line | Recovery | 0.333333333 |
| 156 | male | Han | 10.4630137 | Chongqing | 1 | 2020/4/27 | 2020 | No or not clear | Yes | New case | Yes | PTB | First line | Recovery | 0.166666667 |
| 157 | female | Han | 2.950684932 | Sichuan | 2 | 2020/5/8 | 2020 | Yes | Yes | New case | No | PTB | First line | Recovery | 0.233333333 |
| 158 | female | Han | 9.887671233 | Sichuan | 2 | 2020/5/15 | 2020 | Yes | Yes | New case | Yes | PTB and EPTB | Second line | Recovery | 0.133333333 |
| 159 | female | Han | 0.276712329 | Yunan | 2 | 2020/6/4 | 2020 | Yes | No | New case | Yes | PTB and EPTB | First and Second line | Recovery | 0.633333333 |
| 160 | female | Tujia | 12.67945205 | Chongqing | 1 | 2020/6/16 | 2020 | No or not clear | Yes | New case | No | PTB | First line | Recovery | 0.233333333 |
| 161 | male | Tujia | 0.054794521 | Chongqing | 1 | 2020/6/29 | 2020 | No or not clear | No | New case | Yes | PTB and EPTB | First and Second line | Recovery | 0.166666667 |
| 162 | male | Han | 0.994520548 | Guizhou | 1 | 2020/5/3 | 2020 | Yes | Yes | New case | Yes | PTB and EPTB | First and Second line | Recovery | 0.566666667 |
| 163 | male | Han | 12.66575342 | Sichuan | 1 | 2020/6/17 | 2020 | Yes | Yes | New case | No | PTB | First line | Recovery | 0.433333333 |
| 164 | male | Han | 14.42739726 | Chongqing | 2 | 2020/6/24 | 2020 | No or not clear | Yes | New case | Yes | PTB | First line | Recovery | 0.7 |
| 165 | female | Han | 0.205479452 | Chongqing | 1 | 2020/6/27 | 2020 | Yes | Yes | New case | Yes | PTB and EPTB | Second line | Recovery | 0.433333333 |
| 166 | female | Han | 12.47671233 | Chongqing | 1 | 2020/6/30 | 2020 | No or not clear | Yes | New case | Yes | PTB and EPTB | First line | Recovery | 0.2 |
| 167 | female | Han | 0.44109589 | Chongqing | 1 | 2020/7/8 | 2020 | No or not clear | Yes | New case | Yes | PTB and EPTB | First and Second line | Recovery | 0.3 |
| 168 | female | Han | 10.68493151 | Chongqing | 1 | 2020/7/16 | 2020 | No or not clear | Yes | New case | Yes | PTB and EPTB | First line | Recovery | 6.033333333 |
| 169 | male | Han | 12.06575342 | Chongqing | 1 | 2020/7/23 | 2020 | No or not clear | Yes | New case | Yes | PTB | Second line | Addition of one or two second line drugs for slow recovery | 12.13333333 |
| 170 | female | Han | 14.47671233 | Chongqing | 1 | 2020/7/30 | 2020 | Yes | Yes | New case | Yes | PTB | First line | Recovery | 0.7 |
| 171 | male | Han | 0.205479452 | Sichuan | 2 | 2020/7/28 | 2020 | Yes | Yes | New case | Yes | PTB and EPTB | First and Second line | Recovery | 0.3 |
| 172 | female | Han | 12.80821918 | Sichuan | 2 | 2020/8/11 | 2020 | Yes | Yes | New case | Yes | PTB and EPTB | First line | Recovery | 12.06666667 |
| 173 | female | Han | 3.473972603 | Guizhou | 1 | 2020/7/28 | 2020 | Yes | Yes | New case | Yes | PTB | First and Second line | Addition of one or two second line drugs for slow recovery | 0.366666667 |
| 174 | female | Han | 8.205479452 | Sichuan | 2 | 2020/8/19 | 2020 | Yes | Yes | New case | Yes | PTB | Second line | Recovery | 8.166666667 |
| 175 | female | Han | 15.37260274 | Chongqing | 2 | 2020/9/12 | 2020 | No or not clear | Yes | New case | No | PTB | First line | Recovery | 1.233333333 |
| 176 | male | Han | 10.28493151 | Sichuan | 2 | 2020/9/18 | 2020 | No or not clear | Yes | New case | No | PTB | First line | Recovery | 0.55 |
| 177 | female | Tujia | 13.91780822 | Guizhou | 1 | 2020/9/15 | 2020 | No or not clear | Yes | New case | Yes | PTB | First line | Addition of one or two second line drugs for slow recovery | 2.133333333 |
| 178 | female | Han | 7.904109589 | Chongqing | 2 | 2020/9/6 | 2020 | No or not clear | Yes | New case | No | PTB | First line | Recovery | 0.416666667 |
| 179 | male | Han | 2.156164384 | Chongqing | 1 | 2020/9/16 | 2020 | No or not clear | Yes | New case | Yes | PTB and EPTB | First line | Recovery | 0.6 |
| 180 | male | Miao | 12.79178082 | Chongqing | 2 | 2020/9/21 | 2020 | No or not clear | Yes | New case | Yes | PTB and EPTB | First line | Recovery | 0.366666667 |
| 181 | female | Han | 12.25479452 | Chongqing | 2 | 2020/10/16 | 2020 | No or not clear | Yes | New case | Yes | PTB | First line | Recovery | 1.033333333 |
| 182 | male | Li | 5.64109589 | Guizhou | 2 | 2020/9/24 | 2020 | No or not clear | Yes | Retreatment | Yes | PTB and EPTB | First line | Recovery | 1.133333333 |
| 183 | female | Han | 8.81369863 | Chongqing | 1 | 2020/10/19 | 2020 | No or not clear | No | New case | No | PTB | First line | Recovery | 1.866666667 |
| 184 | female | Han | 14.86575342 | Chongqing | 2 | 2020/10/16 | 2020 | No or not clear | Yes | New case | Yes | PTB | First line | Recovery | 0.6 |
| 185 | male | Han | 1.583561644 | Chongqing | 2 | 2020/11/2 | 2020 | Yes | Yes | New case | No | PTB | First and Second line | Addition of one or two second line drugs for slow recovery | 0.6 |
| 186 | male | Han | 1.61369863 | Sichuan | 2 | 2020/11/20 | 2020 | No or not clear | Yes | New case | Yes | PTB and EPTB | First line | Recovery | 0.6 |
| 187 | female | Han | 9.394520548 | Guizhou | 2 | 2018/1/7 | 2018 | No or not clear | Yes | New case | Yes | PTB and EPTB | First line | Death or abandon treatment | 0.433333333 |
| 188 | female | Han | 1.15890411 | Sichuan | 2 | 2018/10/28 | 2018 | No or not clear | Yes | New case | No | PTB | First line | Recovery | 0.733333333 |
| 189 | female | Han | 3.364383562 | Chongqing | 2 | 2018/11/20 | 2018 | No or not clear | Yes | New case | No | PTB | First line | Recovery | 0.333333333 |
| 190 | male | Han | 0.567123288 | Sichuan | 1 | 2018/12/5 | 2018 | No or not clear | Yes | New case | Yes | PTB and EPTB | First and Second line | Addition of one or two second line drugs for slow recovery | 0.433333333 |
| 191 | female | Han | 11.39178082 | Chongqing | 2 | 2018/12/17 | 2018 | No or not clear | Yes | New case | Yes | PTB and EPTB | First and Second line | Addition of one or two second line drugs for slow recovery | 0.466666667 |
| 192 | female | Miao | 14.21643836 | Chongqing | 1 | 2018/12/25 | 2018 | No or not clear | Yes | New case | No | PTB | First line | Recovery | 1.166666667 |
| 193 | male | Han | 13.83287671 | Chongqing | 1 | 2019/1/17 | 2019 | No or not clear | Yes | New case | No | PTB and EPTB | First and Second line | Recovery | 1 |
| 194 | male | Han | 0.375342466 | Guizhou | 2 | 2019/1/15 | 2019 | No or not clear | Yes | New case | Yes | PTB and EPTB | First line | Recovery | 1.166666667 |
| 195 | male | Han | 9.257534247 | Sichuan | 1 | 2019/2/11 | 2019 | Yes | Yes | New case | No | PTB | First line | Recovery | 0.8 |
| 196 | female | Han | 2.210958904 | Sichuan | 2 | 2019/11/29 | 2019 | No or not clear | Yes | New case | Yes | EPTB | First line | Death or abandon treatment | 0.333333333 |
| 197 | female | Han | 12.44383562 | Chongqing | 1 | 2020/1/7 | 2020 | No or not clear | Yes | New case | No | PTB | First line | Recovery | 0.733333333 |
| 198 | male | Han | 14.43561644 | Chongqing | 2 | 2020/1/15 | 2020 | Yes | No | New case | Yes | PTB | First and Second line | Recovery | 6.1 |
| 199 | male | Han | 7.679452055 | Sichuan | 2 | 2020/1/22 | 2020 | Yes | Yes | New case | Yes | PTB | First line | Recovery | 1.066666667 |
| 200 | female | Han | 13.89863014 | Chongqing | 1 | 2020/7/29 | 2020 | No or not clear | Yes | New case | Yes | PTB and EPTB | Second line | Recovery | 0.6 |
| 201 | male | Han | 3.934246575 | Sichuan | 2 | 2020/7/13 | 2020 | No or not clear | Yes | New case | Yes | PTB and EPTB | Second line | Recovery | 1.166666667 |
| 202 | male | Han | 16.01643836 | Chongqing | 1 | 2020/7/28 | 2020 | Yes | Yes | New case | Yes | PTB and EPTB | First and Second line | Recovery | 4.133333333 |
| 203 | male | Han | 16.71506849 | Guizhou | 2 | 2020/7/10 | 2020 | No or not clear | No | New case | Yes | PTB and EPTB | First and Second line | Recovery | 1.266666667 |
| 204 | female | Han | 12.5260274 | Sichuan | 2 | 2020/8/1 | 2020 | No or not clear | No | New case | Yes | PTB and EPTB | First line | Recovery | 1.1 |
| 205 | female | Han | 12.09041096 | Sichuan | 1 | 2020/8/6 | 2020 | No or not clear | Yes | New case | Yes | PTB and EPTB | First line | Recovery | 1.166666667 |
| 206 | female | Han | 0.060273973 | Chongqing | 2 | 2020/8/27 | 2020 | Yes | No | New case | Yes | PTB and EPTB | First line | Recovery | 0.9 |
| 207 | female | Han | 13.92054795 | Guizhou | 2 | 2020/9/23 | 2020 | No or not clear | Yes | New case | No | PTB | First line | Recovery | 12.33333333 |
| 208 | male | Han | 10.18630137 | Chongqing | 2 | 2019/10/12 | 2019 | No or not clear | Yes | New case | No | PTB | First line | Recovery | 0.366666667 |
